# Supplementary material
Source: ML conference proceedings conference paper supplement (https://openreview.net/forum?id=eSIRst0WVy)
Supplement: supplementary_material [file 17590_full_paper.pdf › 17590_full_paper.pdf]

---

# Don't Trade Off Safety: Diffusion Regularization for Constrained Offline RL

---

Anonymous Author(s)

Affiliation

Address

email

## Abstract

1        Constrained reinforcement learning (RL) seeks high-performance policies under  
2        safety constraints. We focus on an offline setting where the agent learns from a fixed  
3        dataset—a common requirement in realistic tasks to prevent unsafe exploration. To  
4        address this, we propose Diffusion-Regularized Constrained Offline Reinforcement  
5        Learning (DRCORL), which first uses a diffusion model to capture the behavioral  
6        policy from offline data and then extracts a simplified policy to enable efficient  
7        inference. We further apply gradient manipulation for safety adaptation, balancing  
8        the reward objective and constraint satisfaction. This approach leverages high-  
9        quality offline data while incorporating safety requirements. Empirical results show  
10       that DRCORL achieves reliable safety performance, fast inference, and strong  
11       reward outcomes across robot learning tasks. Compared to existing safe offline  
12       RL methods, it consistently meets cost limits and performs well with the same  
13       hyperparameters, indicating practical applicability in real-world scenarios.

## 14    1 Introduction

15    Offline reinforcement learning (RL) has advanced decision-making by learning from pre-collected  
16    datasets without online interaction [Fujimoto et al., 2019, Levine et al., 2020]. For real-world control  
17    tasks (e.g., autonomous driving, industrial control), safety is equally critical. Safe RL addresses  
18    this by imposing constraints, often formulated as a constrained Markov decision process (CMDP)  
19    [Gu et al., 2024c, Altman, 2021], to ensure high performance without violating safety requirements.  
20    These can be hard constraints (no violation at each step) [Zheng et al., 2024, Ganai et al., 2024] or  
21    soft constraints (expected total cost below a threshold) [Chow et al., 2018, Yang et al., 2020, Koirala  
22    et al., 2024, Guo et al., 2025, Shi et al., 2021]. We focus on the soft-constraint setting in this work.

23    Offline safe RL faces two main hurdles: distribution shift and reward-safety trade-off. Firstly,  
24    the learned policy may deviate from the offline dataset’s state-action distribution, causing critic  
25    overestimation and extrapolation errors [Fujimoto et al., 2019, Lyu et al., 2022]. To address value  
26    overestimation, previous methods have either constrained the learned policy to remain close to the  
27    behavioral policy Wu et al. [2019], Kumar et al. [2019] or conservatively penalized over-optimistic  
28    out-of-distribution (OOD) state-action pairs Kostrikov et al. [2021], Lyu et al. [2022], Xu et al. [2022].  
29    Secondly, achieving high returns while strictly respecting safety becomes more challenging when  
30    these objectives conflict. Although constrained optimization methods [Achiam et al., 2017, Liu et al.,  
31    2022] handle this in online RL, they rely on on-policy data collection, making them not directly  
32    applicable to offline settings.

33    Hence, the key question is:

34        *How can we balance reward maximization and constraint satisfaction without risk-*  
35        *ing out-of-distribution actions or unsafe behavior in a setting where no additional*  
36        *data can be collected?*

To address this, we propose *Diffusion-Regularized Constrained Offline Safe Reinforcement Learning* (DRCORL). First, DRCORL trains a diffusion policy to imitate the behavioral policy in the offline dataset; then it regularizes the learned policy via the diffusion model’s score function—removing the need for costly sampling from the diffusion model at inference. Second, we apply gradient manipulation to balance reward optimization and cost minimization, effectively handling conflicts between these two objectives. Furthermore, the behavioral policy serves as a regularizer, discouraging OOD actions that may compromise safety.

We evaluate DRCORL on the DSRL benchmark [Liu et al., 2023a], comparing against state-of-the-art offline safe RL methods. Experiments show that DRCORL consistently attains higher rewards while satisfying safety constraints. Our main contributions are: ① We exploit diffusion-based regularization to build a simple, high-speed policy with robust performance; and ② We introduce a gradient-manipulation mechanism for reward–cost trade-offs in purely offline settings, ensuring safety without sacrificing returns.

## 2 Preliminary

A Constrained Markov Decision Process (CMDP) [Altman, 2021] is defined by the tuple  $\langle \mathcal{S}, \mathcal{A}, P, r, c, \gamma \rangle$ , where  $\mathcal{S}$  and  $\mathcal{A}$  represent the state and action spaces, respectively. The transition kernel  $P$  specifies the probability  $P(s'|s, a)$  of transitioning from state  $s$  to state  $s'$  when action  $a$  is taken. The reward function is  $r : \mathcal{S} \times \mathcal{A} \rightarrow \mathbb{R}$ , and the cost function is  $c : \mathcal{S} \times \mathcal{A} \rightarrow \mathbb{R}$ . The discount factor is denoted by  $\gamma$ . A policy is a function  $\pi : \mathcal{S} \rightarrow \Delta(\mathcal{A})$  that represents the agent’s decision rule, i.e., the agent takes action  $a$  with probability  $\pi(a|s)$  in state  $s$ , and we define  $\Pi$  as the set of all feasible policies. Under policy  $\pi$ , the value function is defined as  $V_\diamond^\pi(\rho) = \mathbb{E}[\sum_{t=0}^{\infty} \gamma^t \diamond(s_t, a_t) | s_0 \sim \rho]$ , where  $\diamond \in \{r, c\}$ ,  $\rho$  is the initial distribution, and the expectation is taken over all possible trajectories. Similarly, the associated Q-function is defined as  $Q_\diamond^\pi(s, a) = \diamond(s, a) + \gamma \mathbb{E}_{s' \sim P(\cdot|s, a)}[V_\diamond^\pi(s')]$  for  $\diamond \in \{r, c\}$ . In standard CMDP, the objective is to find a policy  $\pi \in \Pi$  that maximizes the cumulative rewards  $V_r^\pi(\rho)$  while ensuring that the cumulative cost  $V_c^\pi(\rho)$  remains within a predefined budget  $l$ .

In the offline setting, the agent cannot interact directly with the environment and instead relies solely on a static dataset  $\mathcal{D}^\mu = \{(s_i, a_i, r_i, s'_i, c_i)\}_{i=1}^N$  consisting of multiple transition tuples, which is collected using a behavioral policy  $\pi_b(a|s)$ . This offline nature introduces the risk of distributional shift between the dataset and the learned policy. To mitigate this, an additional constraint is often imposed to limit the deviation of the learned policy  $\pi$  from the behavioral policy  $\pi_b$ , resulting in the optimization problem

$$\max_{\pi \in \Pi} \mathbb{E}[V_r^\pi(\rho)] \text{ s.t. } D_{\text{KL}}(\pi \| \pi_b) \leq \epsilon, \mathbb{E}[V_c^\pi(\rho)] \leq l, \quad (1)$$

where  $D_{\text{KL}}(p \| q)$  the KL-divergence between two distributions defined as  $D_{\text{KL}}(p \| q) = \mathbb{E}_{x \sim p}[\log(p(x)/q(x))]$ . We use the KL-divergence to penalize the learned policy  $\pi$ ’s distance to the behavioral policy, though it is actually not a distance measure. To address safety constraints, primal-dual methods Ding et al. [2021], Paternain et al. [2022], Wu et al. [2024] typically reformulate the constrained optimization problem as follows:

$$\max_{\pi \in \Pi} \mathbb{E}[V_r^\pi(\rho)] - \lambda(\mathbb{E}[V_c^\pi(\rho)] - l) \text{ s.t. } D_{\text{KL}}(\pi \| \pi_b) \leq \epsilon, \quad (2)$$

where  $\lambda \geq 0$  is a surrogate for the Lagrange multiplier. When the safety constraint is violated, the multiplier  $\lambda$  increases to impose a greater penalty on the cost, thereby reducing the cost value.

## 3 Methodology

### 3.1 Diffusion Model for Policy Extraction

Our main idea is to fully exploit the offline dataset to obtain a behavioral policy, and use the behavioral policy to guide the training of the target policy. A policy  $\pi(a|s)$  is a distribution on the action space. Previous work estimated the behavior policy with maximum likelihood estimation Fujimoto and Gu [2021] or leveraged a conditional variational autoencoder Kingma [2013], Sohn et al. [2015]. Here, we exploit the concept of diffusion models Sohl-Dickstein et al. [2015], Ho et al. [2020], Song et al. [2020b] to learn the unknown behavioral policy  $\pi_b(a|s)$  given its strong generative capabilities. Diffusion models have emerged as powerful generative tools to generate data sample  $x_0 \sim p(x_0)$

with few-shot samples. They work by using a forward process  $q(x_t|x_0)$  to perturb the original distribution to a known noise distribution. Subsequently, this model generates the samples using the reverse denoising process  $p_\psi(x_{t-1}|x_t)$ . The forward process can generally be written with a forward stochastic differential equation (SDE)

$$dx = -\frac{\beta(t)}{2}xdt + \sqrt{\beta(t)}dW_t, \quad (3)$$

where  $\beta(\cdot) : [0, T] \rightarrow \mathbb{R}^+$  is a scalar function and the process  $\{W_t\}_{t \in [0, T]}$  is a standard Brownian motion. Our forward process is the discretized version of SDE in Eq. (3) perturbing the original distribution to Gaussian noise. For example, if we choose a variance preserving SDE for the forward diffusion process as in Ho et al. [2020], each step  $x_t$  is perturbed with the noise  $z_t \sim \mathcal{N}(0, I)$  to obtain  $x_{t+1} = \sqrt{\alpha_t}x_t + \sqrt{\beta_t}z_t$ , where  $\beta_t = 1 - \alpha_t \in (0, 1)$ . We denote  $\bar{\alpha}_t = \prod_{i=1}^t \alpha_i$  and  $\bar{\beta}_t = 1 - \bar{\alpha}_t$ . Therefore, we can rewrite  $x_t = \sqrt{\bar{\alpha}_t}x_0 + \sqrt{\bar{\beta}_t}\epsilon_t$ , where  $\epsilon_t \sim \mathcal{N}(0, I)$  follows the standard Gaussian distribution. The reverse denoising process is optimized by maximizing the evidence lower bound of the log-likelihood  $\mathbb{E}[\log p_\psi(x_0)]$  defined as  $\mathbb{E}_{q(x_0:x_T)}[\log(p_\psi(x_{0:T})/q(x_{1:T}|x_0))]$ . We can then rewrite the loss function into the weighted regression objective in Eq. (4) and transform the problem into training a denoising function  $\epsilon_\psi$  predicting the Gaussian noise  $\epsilon_t$ :

$$\mathcal{L}(\psi) = \mathbb{E}_{t \in \text{Unif}[0, T]}[w(t)\|\epsilon_\psi(x_t, t) - \epsilon_t\|^2], \quad \epsilon_t \sim \mathcal{N}(0, I), \quad (4)$$

where  $w(t)$  is the weight function. Then the reversing denoising process can be formulated as  $x_{t-1} = \frac{1}{\sqrt{\alpha_t}}(x_t - \frac{\sqrt{1-\alpha_t}}{\sqrt{1-\bar{\alpha}_t}}\epsilon_\psi(x_t, t)) + \sqrt{\beta_t}z_t$ , where  $z_t \sim \mathcal{N}(0, I)$ . Using this notion, we can similarly use the diffusion model to diffuse in the action space  $\mathcal{A}$  and sample actions given the current state with the reversing process. In Wang et al. [2022], the authors learned diffusion policies from the offline dataset using guided diffusion. The diffusion policy here is  $\pi_\psi(a|s) = \mathcal{N}(a_T; 0, I) \prod_{t=1}^T p_\psi(a_{t-1}|a_t, s)$ , where  $p_\psi(a_{t-1}|a_t, s)$  is a Gaussian distribution with mean  $m_\psi(a_t, t|s)$  and variance  $\Sigma_\psi(a_t, t|s)$ . See also Lu et al. [2023], Hansen-Estruch et al. [2023], where diffusion policy is used for inference in policy evaluation. The limitation of these methods is that the diffusion models are slow in inference speed, even under the improved sampling scheme in Song et al. [2020a], Lu et al. [2022] the reverse denoising process takes at least 10 steps. Therefore, in this work we mainly use diffusion models for pretraining and learning the behavioral policy  $\pi_b$ . For state-action pair  $(s, a)$  in the offline dataset  $\mathcal{D}^\mu$ , we train our diffusion policy model by minimizing the loss

$$\mathcal{L} = \mathbb{E}_{(s,a) \in \mathcal{D}^\mu} \mathbb{E}_{t \in \text{Unif}(0, T)}[w(t)\|\epsilon_\psi(a_t, t|s) - \epsilon_t\|^2], \quad (5)$$

where  $a_t = \sqrt{\bar{\alpha}_t}a + \sqrt{\bar{\beta}_t}z$  and  $z \sim \mathcal{N}(0, I)$ . We assume that the diffusion model can perfectly learn the behavioral policy  $\pi_b$ , as shown in De Bortoli [2022], due to the fact that the target distribution lies on a compact manifold, the first-order Wasserstein distance between the learned policy and the target policy converges to 0 as the discretization length approaches 0.

### 3.2 Diffusion Regularization

The work Chen et al. [2023] showed under the offline RL setting that one can train a simple policy using the pretrained critic and diffusion policy imitating the behavioral policy. The key step is to use the reverse KL divergence to regularize the target policy to be close to the behavioral policy. The forward KL is the KL-divergence  $D_{\text{KL}}(\pi^*(\cdot|s) \parallel \pi_\theta(\cdot|s))$  while the reverse KL is  $D_{\text{KL}}(\pi_\theta(\cdot|s) \parallel \pi^*(\cdot|s))$ . As shown in Chen et al. [2023], the forward KL leads to mode covering issue while backward KL encourages mode-seeking behavior, although the latter is harder to optimize. Therefore, in this work we also choose the reverse KL for regularization. We also constrain our policy family to a simple Gaussian policy class  $\Pi : \{\pi_\theta(a|s) = \mathcal{N}(a; m_\theta(s), \Sigma_\theta(s))\}$ . Now, we denote the learned diffusion model's score function as  $\epsilon_\psi(a_t, t|s)$  and the corresponding diffusion policy as  $\mu_\psi(a|s)$ . Then, the reverse KL between the policy  $\pi_\theta(a|s)$  and the approximated behavioral policy  $\mu_\psi(a|s)$  can be written as  $-\mathcal{H}(\pi_\theta(\cdot|s)) + H(\pi_\theta(\cdot|s), \mu_\psi(\cdot|s))$ . For Gaussian policy, the first part self-entropy term  $\mathcal{H}$  can be directly computed in closed form. For  $\mathcal{A} = \mathbb{R}^d$ , we have

$$\mathcal{H}(\pi_\theta(\cdot|s)) = \int_{\mathcal{A}} -\log \pi_\theta(a|s) \pi_\theta(a|s) da = \frac{1}{2} \log(\det(\Sigma_\theta(s))) + \frac{d}{2} \log(2\pi) + \frac{d}{2}. \quad (6)$$

Using the reparameterization trick for Gaussian random variables, we can also rewrite the cross entropy term  $H(\pi_\theta(\cdot|s), \mu_\psi(\cdot|s))$  as

$$H(\pi_\theta(\cdot|s), \mu_\psi(\cdot|s)) = \mathbb{E}_{\pi_\theta(\cdot|s)}[-\log \mu_\psi(a|s)] = \mathbb{E}_{z \sim \mathcal{N}(0, I)}[-\log \mu_\psi(m_\theta + \Sigma_\theta^{1/2}z|s)]. \quad (7)$$

Finally, to obtain the gradient with respect to the reverse KL divergence we have

$$\begin{aligned} \nabla_{\theta} D_{\text{KL}}(\pi_{\theta}(\cdot|s) || \mu_{\psi}(\cdot|s)) &= \nabla_{\theta} H(\pi_{\theta}(\cdot|s), \mu_{\psi}(\cdot|s)) - \nabla_{\theta} \mathcal{H}(\pi_{\theta}(\cdot|s)) \\ &= \mathbb{E}_{z \sim \mathcal{N}(0, I)} \left[ -\nabla_a \log \mu_{\psi}(m_{\theta}(s) + \Sigma_{\theta}^{1/2} z | s) \cdot \nabla_{\theta}(m_{\theta}(s) + \Sigma_{\theta}^{1/2} z) \right] - \frac{1}{2} \nabla_{\theta} \log(\det \Sigma_{\theta}(s)). \end{aligned} \quad (8)$$

The work Song et al. [2020b] shows that diffusion models essentially estimate the **score function**:

$$\nabla_x \log p(x_t) \approx s_{\psi}(x_t, t) = -\frac{1}{\sqrt{\beta_t}} \epsilon_{\psi}(x_t, t). \quad (9)$$

Hence, we can substitute the denoising function  $\epsilon_{\psi}$  into Eq. (8) to directly compute the gradient.

### 3.3 Safe Adaptation

To design our algorithm, we define the reward and cost optimization objectives respectively as follows:

$$\text{Reward: } \max_{\pi \in \Pi} \mathbb{E}_{s \sim \mathcal{D}^{\mu}} [V_r^{\pi}(s) - \frac{1}{\beta} D_{\text{KL}}(\pi(\cdot|s) || \pi_b(\cdot|s))] \quad (10)$$

$$\text{Cost: } \max_{\pi \in \Pi} \mathbb{E}_{s \sim \mathcal{D}^{\mu}} [- (V_c^{\pi}(s) - l) - \frac{1}{\beta} D_{\text{KL}}(\pi(\cdot|s) || \pi_b(\cdot|s))]. \quad (11)$$

We consider the reverse KL divergence term in Eq. (10) and Eq. (11) as a regularization term to penalize the policy for deviating too far from the behavioral policy  $\pi_b$ . In practice implementation, we use the learned diffusion policy  $\mu_{\psi}$  to replace  $\pi_b$  and compute the gradient for optimization using Eq. (8). As discussed in Gu et al. [2024a], to address the conflict between optimizing reward and cost, it is essential to directly handle the gradient at each optimization step. We also adopt the gradient manipulation idea in Gu et al. [2024a], but we do so under the offline setting where we no longer have access to updating our critic with the on-policy data. The gradient manipulation method can be generally described as follows. For each step where we need to optimize the reward, we update our gradient with  $\theta \leftarrow \theta + \eta g_r$ , and when we need to optimize the cost our gradient is updated with  $\theta \leftarrow \theta + \eta g_c$ . The gradient manipulation aims at updating the parameter  $\theta$  with a linear combination of the two gradients as  $\beta_r g_r + \beta_c g_c$ . We can

use the angle  $\phi := \cos^{-1} \left( \frac{\langle g_r, g_c \rangle}{\|g_r\| \|g_c\|} \right)$  between the two gradients to judge whether the gradients are conflicting or not, namely if  $\phi > 90^\circ$  the two gradients are conflicting and otherwise they are not conflicting. Especially, the final gradient  $g$  is computed via the rule

$$g = \begin{cases} \frac{g_r + g_c}{2}, & \text{if } \phi \in (0, 90^\circ) \\ \frac{g_r^+ + g_c^+}{2}, & \text{if } \phi \in [90^\circ, 180^\circ], \end{cases} \quad (12)$$

where  $g_r^+ = g_r - \frac{g_r \cdot g_c}{\|g_c\|^2} g_c$  is  $g_r$ 's projection on the null space of  $g_c$  and  $g_c^+ = g_c - \frac{g_c \cdot g_r}{\|g_r\|^2} g_r$  is  $g_r$ 's projection on the null space of  $g_c$ . In Gu et al. [2024a] under the assumption of the convexity of the optimization target, one can ensure monotonic improvement using gradient manipulation. Therefore we also employ the gradient manipulation method to update our policy. With the procedures outlined above, we present our Algorithm 1, where the safe adaptation step is visualized in Figure 1 and detailed in Algorithm 2 given in Appendix B. Furthermore, we provide the following theoretical results derived from our algorithm, where the proof is deferred to Appendix A.1.

**Proposition 3.1** (Cost Upper Bound). *Assume that the cost function  $c : \mathcal{S} \times \mathcal{A} \rightarrow [0, c_{\max}]$  is bounded and non-negative. Let  $\tilde{\pi}(a|s)$  be the output policy of Algorithm 1. Suppose that there exists  $\epsilon_{\text{dist}} > 0$  such that  $D_{\text{KL}}(\tilde{\pi}(\cdot|s), \pi_b(\cdot|s)) \leq \epsilon_{\text{dist}}$  and  $D_{\text{KL}}(\pi_b(\cdot|s), \tilde{\pi}(\cdot|s)) \leq \epsilon_{\text{dist}}$ . Let  $\epsilon_{\text{adv}}^b = \max_s \mathbb{E}_{a \sim \pi_b(\cdot|s)} [A_c^{\tilde{\pi}}(s, a)]$ , where  $A_c^{\pi}(s, a)$  is the advantage function under policy  $\pi$ , defined as:  $A_c^{\pi}(s, a) = Q_c^{\pi}(s, a) - V_c^{\pi}(s)$ . Then, it holds that:*

$$V_c^{\tilde{\pi}}(\rho) \leq V_c^{\pi_b}(\rho) + \frac{(c_{\max} + \gamma \epsilon_{\text{adv}}^b) \sqrt{2\epsilon_{\text{dist}}}}{(1 - \gamma)^2}. \quad (13)$$

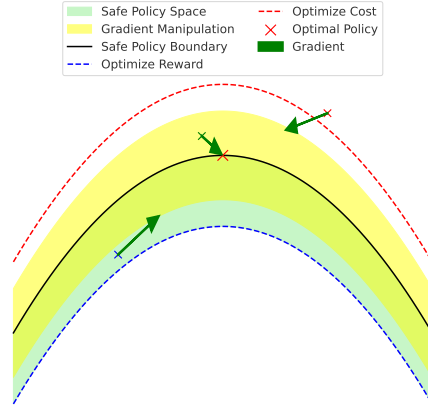

Figure 1: Illustration of the soft switching between safe and unsafe policy regions.

168 This proposition establishes that if the learned policy is constrained to remain within a neighborhood  
 169 of the dataset’s behavior policy, its safety performance is at least guaranteed to match that of the  
 170 behavior policy underlying the dataset.

171 To theoretically ground our algorithm, we ana-  
 172 lyze its convergence properties in the tabular set-  
 173 ting, where the state and action spaces are finite  
 174 (i.e.,  $|S|, |A| < \infty$ ). Under softmax parameter-  
 175 ization, we derive convergence guarantees when  
 176 optimizing the value function using the natural  
 177 policy gradient (NPG) algorithm.

178 **Definition 3.1** (Softmax Parameterization). *Un-  
 179 der the tabular MDP setting, the policy follows  
 180 a softmax parameterization, where the policy  $\pi$   
 181 is parameterized by  $\theta : S \times A \rightarrow \mathbb{R}$ . The policy  
 182 is expressed as  $\pi_\theta(a|s) = \frac{\exp(\theta(s,a))}{\sum_{a' \in A} \exp(\theta(s,a'))}$ .*

183 We use natural policy gradient method [Kakade  
 184 and Langford, 2002] to update policy, where the policy parameter  $\theta$  is updated as  $\theta \leftarrow \theta +$   
 185  $\eta(\mathcal{F}_\rho^\theta)^\dagger \nabla_\theta V^\pi(\rho)$  at each iteration, where  $\mathcal{F}_\rho^\theta = \mathbb{E}_{s \sim \rho, a \sim \pi} [\nabla_\theta \log \pi_\theta(a|s) \nabla_\theta \log \pi_\theta(a|s)^\top]$  is the  
 186 Fisher information matrix, and the  $\dagger$  operator is the Moore-Penrose inverse.

187 **Theorem 3.1.** *Let  $\tilde{\pi}$  be the weighted policy obtained after  $T$  iterations of Algorithm 1 with proper  
 188 step-sizes. Suppose that the offline dataset has a size of  $|\mathcal{D}^\mu| = \mathcal{O}(\frac{C \ln(|\mathcal{F}|/\delta)}{\epsilon_{\text{offline}}(1-\gamma)^4})$  for some  $\delta \in (0, 1)$ ,  
 189 where  $\mathcal{F}$  represents the critic function family. Then, with probability  $\geq 1 - \delta$ , the optimality gap and  
 190 constraint violation satisfy that*

$$V_r^{\pi_{\theta^*}}(\rho) - \mathbb{E}[V_r^{\tilde{\pi}}(\rho)] \leq \mathcal{O}(\epsilon_{\text{offline}}) + \mathcal{O}\left(\sqrt{\frac{|S||A|}{(1-\gamma)^3 T}}\right), \quad (14)$$

$$\mathbb{E}[V_c^{\tilde{\pi}}(\rho)] - b \leq \mathcal{O}(\epsilon_{\text{offline}}) + \mathcal{O}\left(\sqrt{\frac{|S||A|}{(1-\gamma)^3 T}}\right). \quad (15)$$

191 where  $\epsilon_{\text{offline}}$  denotes the approximation error of policy evaluation induced by the offline dataset  $\mathcal{D}^\mu$ .

192 For simplicity, we drop the reverse KL term to ensure the policy’s closed-form update under NPG in  
 193 our proof. The SafeAdaptation step in Algorithm 1 is specified in algorithm 2 given in Appendix B.  
 194 We specify the definition of the weighted policy  $\tilde{\pi}$  in Eq. (41) given in Appendix A.2. We can interpret  
 195 the theorem as follows: by selecting appropriate slack bounds  $h^+$  and  $h^-$ , the policy optimization  
 196 process will, over time, primarily remain in the reward optimization and gradient manipulation stages.  
 197 As a result, the cost violation can be effectively upper bounded. Simultaneously, by ensuring that the  
 198 policy is updated using the reward critic’s gradients for the majority of iterations, we can guarantee  
 199 that the accumulated reward of the weighted policy closely approximates that of the optimal policy.

## 200 4 Practical Algorithm

201 In this section, we present the detailed procedure for the implementation of our main algorithm  
 202 *Diffusion-Regularized Constrained Offline Safe Reinforcement Learning* (DRCORL), as outlined in  
 203 Algorithm 1, where we provide the SafeAdaptation step outlined in Algorithm 2 given in Appendix  
 204 B. This includes both the pretraining stage and the policy extraction stage.

### 205 4.1 Pretraining the Diffusion Policy and Critics

206 In the pretraining state, we first use the offline dataset  $\mathcal{D}^\mu$  to pretrain the diffusion policy  $\mu_\psi(a|s)$   
 207 to simply imitate the behavioral policy by minimizing the loss in Eq. (5). Then we also pretrain  
 208 the critic functions  $Q_r^\pi$  and  $Q_c^\pi$ , but we pretrain the reward critic with Implicit Q-Learning (IQL)  
 209 Kostrikov et al. [2021] and pretrain the cost critic with TD learning with pessimistic estimation. We  
 210 utilize IQL to train the reward critic function by maintaining two Q-functions ( $Q_{r_1}^\pi, Q_{r_2}^\pi$ ) and one

---

#### Algorithm 1 DRCORL

---

```

1: Input: Dataset  $\mathcal{D}^\mu$ , slack bounds  $h^+, h^-$ 
2: Pretrain diffusion model  $\epsilon_\psi$ 
3: // Behavior Cloning
4: Pretrain  $Q_r^\pi, Q_c^\pi$ 
5: // Pretrain critic
6: for each gradient step  $t$  do
7:   Sample mini-batch  $\mathcal{B}$ 
8:   Update critics for reward and cost
9:    $g \leftarrow \text{SafeAdaptation}(\dots)$ 
10:  Update  $\theta \leftarrow \theta + \eta g$ 
11: end for

```

---

value function  $V$  as the critic for the reward. The loss function for the value function  $V_r^\pi$  is defined as:

$$L_{V_r^\pi} = \mathbb{E}_{s,a \sim \mathcal{D}^\mu} [L_2^\tau(\min(Q_{r_1}^\pi(s, a), Q_{r_2}^\pi(s, a)) - V_r^\pi(s))], \quad (16)$$

where  $L_2^\tau(u) = |\tau - \mathbb{I}(u < 0)|u^2$ , and  $\tau \in [0, 1]$  is a quantile. When  $\tau = 0.5$ ,  $L_2^\tau$  simplifies to the  $L_2$  loss. When  $\tau > 0.5$ ,  $L_2^\tau$  encourages the learning of the  $\tau$  quantile values of  $Q$ . The loss function for updating  $Q_{r_i}^\pi$  is given by:

$$\mathcal{L}_{Q_{r_i}^\pi} = \mathbb{E}_{(s,a,s' \sim \mathcal{D}^\mu)} [\|r(s, a) + \gamma V_r^\pi(s') - Q_{r_i}^\pi(s, a)\|^2]. \quad (17)$$

This setup aims to minimize the error between the predicted Q-values and the target values derived from the value function  $V_r^\pi$ . We employ IQL to pretrain the reward critic function, thereby approximating the optimal Q-function  $Q_r^*$  without incorporating safety constraints. Additionally, we pretrain the cost critics using the temporal difference method and double-Q learning Sutton [1988]. However, in the offline RL setting, we adopt a pessimistic estimation approach for the cost critic using a positive hyperparameter  $\alpha$  to avoid underestimation as stated in Eq. (18), thereby preventing the learning of unsafe policies. The cost critic can be updated by solving the optimization problem:

$$\min_{\pi \in \Pi} \mathbb{E}_{s,a,s',a' \sim \pi(\cdot|s')} [\|c(s, a) + \gamma Q_c^\pi(s', a') - Q_c^\pi(s, a)\|^2] - \alpha \mathbb{E}_{s,a \sim \pi} [Q_c^\pi(s, a)]. \quad (18)$$

## 4.2 Extracting Policy

Now, we extract the policy  $\pi_\theta$  from the diffusion model  $\epsilon_\psi$  and the pretrained critic functions. Note that at this stage we need to optimize the reward while preventing the unsafe performance. Therefore, we define two optimization targets, one for the reward and one for the cost. The reward optimization target is defined as maximizing the critic value regularized by the KL-divergence with respect to the behavioral policy, a smaller value of the temperature  $\beta$  refers to the higher conservativeness of our algorithm:

$$\max \mathbb{E}_{s,a \sim \pi_\theta} \left[ Q_r^{\pi_\theta}(s, a) - \frac{1}{\beta} l(\pi_\theta, \mu_\psi | s) \right], \quad (19)$$

where  $l(\pi_\theta, \mu_\psi | s)$  denotes the KL-divergence  $D_{\text{KL}}(\pi_\theta(\cdot|s) \parallel \mu_\psi(\cdot|s))$  for abbreviation. Similarly, we define the cost optimization target as follows. We aim to minimize the cost critic value regularized by the behavioral policy:

$$\max \mathbb{E}_{s,a \sim \pi_\theta} \left[ -(Q_c^{\pi_\theta}(s, a) - l) - \frac{1}{\beta} l(\pi_\theta, \mu_\psi | s) \right]. \quad (20)$$

Using the result obtained in Section 3.2, we can obtain the gradient of Eq. (19) and Eq. (20) with respect to  $\theta$  using the score function of the diffusion model  $\epsilon_\psi$  and the critic function. We take the Gaussian policy family under a constant variance. For example, with  $\Pi := \{\pi_\theta(a|s) = \mathcal{N}(a; m_\theta(s), \Sigma_\theta(s))\}$ , we can simplify the gradient to

$$\begin{aligned} g_r &= \mathbb{E}_{s,a \sim \pi_\theta} \left[ \left( \nabla_a Q_r^{\pi_\theta}(s, a) + \frac{1}{\beta} h_\psi(s, a) \right) \nabla_\theta \pi_\theta(s) \right], \\ g_c &= \mathbb{E}_{s,a \sim \pi_\theta} \left[ \left( -\nabla_a Q_c^{\pi_\theta}(s, a) + \frac{1}{\beta} h_\psi(s, a) \right) \nabla_\theta \pi_\theta(s) \right]. \end{aligned} \quad (21)$$

where  $h_\psi(s, a) = \frac{1}{\sqrt{\beta_t}} \epsilon_\psi(a_t, t|s)|_{t \rightarrow 0}$ . In Eq. (21),  $a_t$  denotes the action with perturbed noise,  $a_t = \sqrt{\alpha_t} a + \sqrt{\beta_t} \epsilon_t$ ,  $\epsilon_t \sim \mathcal{N}(0, I)$ , and the notation  $\nabla_\theta \pi_\theta(s)$  denotes the gradient of the action given state  $s$  with respect to  $\theta$ . By assuming  $a = m_\theta(s) + \Sigma_\theta^{1/2}(s)z$  where  $z \sim \mathcal{N}(0, I)$ , we obtain that  $\nabla_\theta \pi_\theta(s) = \nabla_\theta m_\theta(s) + \nabla_\theta \Sigma_\theta^{1/2}(s)z$ . Our problem involves two competing objectives: maximizing reward (Eq. 10) and minimizing cost under safety violations (Eq. 20). To reconcile these goals, we adopt the gradient manipulation method from Gu et al. [2024a], originally proposed for online safe RL, as detailed in Algorithm 2. This method introduces slack variables  $h^-$  and  $h^+$ . When  $V_c^\pi(\rho) \leq l - h^-$ , the policy is considered safe, and reward maximization is prioritized. If  $V_c^\pi(\rho) \geq l + h^+$ , we instead focus on cost minimization. Within the transition band  $l - h^- \leq V_c^\pi(\rho) \leq l + h^+$ , we apply gradient manipulation (Eq. 12) to balance the two objectives (Eqs. 19 and 20).

A key challenge is accurate safety assessment in the offline setting, where off-policy data may lead to cost underestimation. Ideally, the estimated critic satisfies  $Q_c^\pi = \hat{Q}_c^\pi + \epsilon$ , with  $\epsilon$  zero-mean.

However, under  $\mathbb{E}_{s,a \sim \pi}[\min \hat{Q}_c^\pi(s, a)] \leq \min \mathbb{E}_{s,a \sim \pi}[Q_c^\pi(s, a)]$ , the error becomes biased, leading to underestimated cost values Thrun and Schwartz [2014]. Temporal difference learning can amplify this bias. While conservative Q-learning mitigates underestimation, it often yields sub-optimal policies. Crucially, unlike reward critics, where relative ranking suffices, underestimating cost critics can produce unsafe policies. To address this, we adopt a conservative evaluation approach inspired by the UCB (Upper Confidence Bound) technique Hao et al. [2019]. Specifically, we train an ensemble of cost critics  $Q_c^{\pi,i}$  for  $i = 1, \dots, E$  and define the UCB estimator as  $Q_c^{\pi, \text{UCB}}(s, a) = \bar{Q}_c^\pi(s, a) + k \cdot \text{Std}_{i \in [E]}(Q_c^{\pi,i}(s, a))$ , where  $\bar{Q}_c^\pi(s, a)$  is the ensemble mean and  $k$  controls the confidence level. We then compute  $Q_c^{\pi, \text{UCB}}(\rho) = \mathbb{E}_{s \sim \rho, a \sim \pi}[Q_c^{\pi, \text{UCB}}(s, a)]$  and compare it against the cost budget to determine whether to prioritize reward or cost. This full procedure is outlined in Algorithm 2.

## 5 Experiments

### 5.1 Performance On DSRL Benchmarks

**Environments.** We evaluate our method on the offline safe RL benchmark DSRL Liu et al. [2023a]. We conduct extensive experiments on Safety-Gymnasium Ray et al. [2019] and Bullet-Safety-Gym Gronauer [2022]. We evaluate the score of different methods using the normalized returns and normalized costs. The normalized returns and costs are defined as  $R_{\text{normalized}} = (R_\pi - R_{\min}) / (R_{\max} - R_{\min})$ ,  $C_{\text{normalized}} = (C_\pi - C_{\min}) / (l + \epsilon)$ .  $\epsilon$  is a regularizer for the case when  $l = 0$ , and we set  $\epsilon = 0.1$ . The reward  $R_\pi$  is the accumulated return collected within an episode  $R_\pi = \sum_{t=1}^T r_t$ . Similarly,  $C_\pi = \sum_{t=1}^T c_t$  is the accumulated cost collected within an episode.  $R_{\max}$ ,  $R_{\min}$  are the maximum and minimum accumulated returns of the offline dataset within an episode. We normalize the accumulated cost and return to better analyze the results. If the normalized cost is below 1.0, we can consider this policy as safe.

**Baseline Algorithms.** We compare the performance of our algorithm against existing offline safe reinforcement learning (RL) algorithms under the soft constraints setting. The following six baseline algorithms are considered: 1) *BC-Safe* (Behavioral Cloning): cloning the safe trajectories within the offline dataset. 2) *BCQ-Lag* Fujimoto et al. [2019]: this approach extends behavioral cloning with Q-learning, framing safe reinforcement learning as a constrained optimization problem. A Lagrangian multiplier Stooke et al. [2020] is used to balance the reward maximization objective with the cost constraints. 3) *BEARL* Kumar et al. [2019]: an extension of BEAR that incorporates a Lagrangian multiplier Stooke et al. [2020] to control cost constraints, enabling safe policy learning. 4) *CDT* (Constrained Decision Transformer) Liu et al. [2023b]: an adaptation of the Decision Transformer Chen et al. [2021] for offline safe reinforcement learning, incorporating cost information into tokens to learn a safe policy. 5) *CPQ* (Conservative Policy Q-Learning) Xu et al. [2022]: this method uses conservative Q-learning to pessimistically estimate the cost critic and updates the reward critic only with safe cost values, ensuring the policy adheres to safety constraints. 6) *COptiDICE* Lee et al. [2022]: based on the DICE algorithm, this method learns a stationary distribution for the safe reinforcement learning problem and extracts the optimal policy from this distribution. 7) *CAPS* Chemingui et al. [2025]: optimizing different constraints with shared representations. 8) *CCAC* Guo et al. [2025]: safety RL algorithm matching state-action distributions and safety constraints. We present the comparison across different baselines in SafetyGym and BulletGym environments.

**Result Analysis.** Table 1 summarizes the normalized accumulated reward and cost per episode across tasks. Overall, our algorithm consistently achieves high rewards while reliably maintaining safety constraints. Notably, our method significantly outperforms baselines in tasks such as *CarGoal1*, *CarGoal2*, *PointGoal1*, *PointGoal2*, and *BallCircle*, ensuring both optimal reward and constraint satisfaction. However, it is fair to acknowledge that BCQ-Lag shows slightly superior reward performance in the *Walker2dVel* task, though such performance does not generalize reliably to other tasks, often violating safety constraints. Similarly, CDT and CAPS achieve good safety in some scenarios, such as *CarGoal2* and *AntVel*, yet underperform significantly in reward optimization in other tasks. Overall, our method demonstrates a robust balance between safety and reward optimization across diverse benchmarks, highlighting its practical applicability.

**Computational Efficiency.** We benchmark inference speeds across algorithms using 1,000 sample inputs on the HalfCheetah task. Apart from the 6 baselines above, We also compare the computation efficiency against diffusion model-based algorithms TREBI Lin et al. [2023] and FISOR Zheng et al. [2024]. While baseline methods like BCQ and CPQ achieve the fastest inference due to their

Table 1: Normalized return ( $\uparrow$ : higher is better) and cost ( $\downarrow$ : lower is better; threshold at 1) for each policy across tasks. Results are averaged over three cost limit scales, 20 evaluation episodes and 5 random seeds. Policies with normalized cost  $\leq 1$  (safe) are bolded; among these, the highest-reward safe policy per task is highlighted in blue. Policies with cost  $> 1$  (unsafe) are shown in gray.

| Task           | BC-Safe           |                   | BEARL             |                   | BCQ-Lag           |                   | CPQ               |                   | COptiDICE         |                   | CDT               |                   | CAPS              |                   | CCAC              |                   | Ours              |                   |
|----------------|-------------------|-------------------|-------------------|-------------------|-------------------|-------------------|-------------------|-------------------|-------------------|-------------------|-------------------|-------------------|-------------------|-------------------|-------------------|-------------------|-------------------|-------------------|
|                | reward $\uparrow$ | cost $\downarrow$ |
| CarGoal1       | <b>0.38</b>       | <b>0.46</b>       | 0.71              | 4.45              | 0.46              | 3.27              | 0.68              | 3.73              | 0.48              | 2.31              | 0.65              | 3.75              | 0.40              | 1.35              | 0.84              | 6.52              | <b>0.91</b>       | <b>0.00</b>       |
| CarGoal2       | <b>0.25</b>       | <b>0.82</b>       | 0.46              | 10.98             | 0.29              | 3.46              | 0.27              | 28.24             | 0.18              | 2.28              | <b>0.03</b>       | <b>0.00</b>       | 0.12              | 2.20              | 0.96              | 6.97              | <b>0.79</b>       | <b>0.60</b>       |
| PointButton1   | 0.17              | 1.37              | 0.35              | 6.71              | 0.17              | 4.00              | 0.56              | 11.63             | 0.09              | 3.55              | 0.62              | 13.05             | 0.16              | 3.66              | 0.71              | 4.27              | <b>0.81</b>       | <b>0.40</b>       |
| PointCircle1   | 0.88              | 3.79              | -0.33             | 17.84             | 0.45              | 8.13              | 0.23              | 6.77              | 0.85              | 18.30             | <b>0.51</b>       | <b>0.00</b>       | <b>0.50</b>       | <b>0.14</b>       | 0.62              | 7.58              | <b>0.53</b>       | <b>0.40</b>       |
| PointGoal1     | <b>0.53</b>       | <b>0.88</b>       | 0.76              | 3.46              | 0.59              | 5.06              | <b>0.41</b>       | <b>0.69</b>       | 0.52              | 5.26              | 0.68              | 4.35              | <b>0.20</b>       | <b>0.53</b>       | 0.77              | 5.20              | <b>0.88</b>       | <b>0.00</b>       |
| PointGoal2     | 0.60              | 3.15              | 0.80              | 12.33             | 0.65              | 10.80             | 0.34              | 5.10              | 0.38              | 4.62              | 0.32              | 1.45              | 0.23              | 1.91              | 0.80              | 4.88              | <b>0.82</b>       | <b>0.00</b>       |
| AntVel         | <b>0.87</b>       | <b>0.52</b>       | <b>-1.01</b>      | <b>0.00</b>       | 0.99              | 8.39              | <b>-1.01</b>      | <b>0.00</b>       | 0.99              | 11.41             | <b>0.91</b>       | <b>0.97</b>       | <b>0.81</b>       | <b>0.36</b>       | <b>0.71</b>       | <b>0.39</b>       | <b>0.88</b>       | <b>0.89</b>       |
| HalfCheetahVel | <b>0.94</b>       | <b>0.71</b>       | 0.95              | 104.45            | 1.06              | 63.94             | 0.71              | 14.70             | <b>0.61</b>       | <b>0.00</b>       | <b>0.96</b>       | <b>0.61</b>       | <b>0.88</b>       | <b>0.22</b>       | <b>0.85</b>       | <b>0.93</b>       | <b>0.86</b>       | <b>0.00</b>       |
| HopperVel      | 0.21              | 1.50              | 0.26              | 124.05            | 0.81              | 14.91             | <b>0.57</b>       | <b>0.00</b>       | 0.14              | 7.83              | 0.21              | 1.12              | <b>0.83</b>       | <b>0.00</b>       | <b>0.11</b>       | <b>0.68</b>       | <b>0.68</b>       | <b>0.79</b>       |
| Walker2dVel    | <b>0.78</b>       | <b>0.08</b>       | <b>0.76</b>       | <b>0.80</b>       | <b>0.80</b>       | <b>0.07</b>       | <b>0.08</b>       | <b>0.95</b>       | 0.12              | 2.34              | 0.73              | 1.95              | <b>0.78</b>       | <b>0.00</b>       | <b>0.21</b>       | <b>0.26</b>       | <b>0.74</b>       | <b>0.30</b>       |
| CarRun         | <b>0.97</b>       | <b>0.10</b>       | 0.49              | 7.43              | <b>0.95</b>       | <b>0.00</b>       | <b>0.92</b>       | <b>0.05</b>       | <b>0.93</b>       | <b>0.00</b>       | 0.99              | 1.10              | <b>0.98</b>       | <b>0.86</b>       | <b>0.93</b>       | <b>0.05</b>       | <b>0.99</b>       | <b>0.30</b>       |
| BallCircle     | <b>0.55</b>       | <b>0.93</b>       | 0.90              | 5.79              | 0.68              | 3.79              | <b>0.64</b>       | <b>0.07</b>       | 0.47              | 4.71              | 0.68              | 2.05              | <b>0.56</b>       | <b>0.18</b>       | <b>0.73</b>       | <b>0.14</b>       | <b>0.78</b>       | <b>0.00</b>       |
| CarCircle      | 0.64              | 2.97              | 0.73              | 1.41              | 0.62              | 2.88              | <b>0.70</b>       | <b>0.00</b>       | 0.47              | 5.81              | 0.73              | 2.24              | <b>0.57</b>       | <b>0.00</b>       | <b>0.72</b>       | <b>0.22</b>       | <b>0.68</b>       | <b>0.79</b>       |

lightweight MLP-based actors, they compromise safety or reward performance. In contrast, our algorithm strictly adheres to cost constraints without sacrificing reward quality. Compared to diffusion or transformer-based approaches our method are superior in inference speed, narrowing the gap between expressive generative models and efficient MLP architectures. The result is in Figure 2 (a).

## 5.2 Ablation Study

**Impact of Different Cost Limits.** We evaluate our algorithm’s performance under varying cost limits  $l = 10, 20$ , and  $30$ , analyzing the learned policies’ behavior for each budget setting. The ablation results are presented in Figure 2 (b). Across all cost limit choices, our algorithm consistently achieves zero violations of the safety constraints, demonstrating its robustness to varying cost thresholds. This highlights the adaptability and reliability of our approach in maintaining safety compliance. While COptiDICE also strictly adheres to the cost limits, our method consistently outperforms it in terms of normalized return, demonstrating its superior ability to balance safety and reward optimization.

**Temperature Parameter Setting.** We compare three diffusion-temperature schedules: (i) constant,  $\beta_t = 0.02$ ; (ii) square-root growth,  $\beta_t = 0.01\sqrt{t}$ ; and (iii) linear growth,  $\beta_t = 0.01t + 0.04$ , held fixed within each epoch. As shown in Figure 3 (Appendix C), all three schemes yield similar performance. Additional temperature ablations are reported in Appendix C.1.

**Choice of Slack Variable.** We introduce slack bounds so that reward maximization applies when  $V_{\text{norm}} \leq 1 - h^-$  and cost minimization when  $V_{\text{norm}} \geq 1 + h^+$ . Both  $h^-$  and  $h^+$  are initialized to  $0.2$  and linearly decayed to zero; we ablate over initial values  $h \in \{0.1, 0.3, 0.5, 0.7\}$ . Figure 4 (Appendix C) illustrates these results, with further slack-value studies in Appendix C.1.

## 6 Related Work

**Diffusion Models in Offline RL.** Diffusion models’ powerful generative capacity for complex data has made them increasingly popular for modeling diverse offline datasets, valuable either for planning Janner et al. [2022], He et al. [2024], Ajay et al. [2022] or expressive policy modeling Chi et al. [2023], Wang et al. [2022], Fang et al. [2024], Hansen-Estruch et al. [2023], Chen et al. [2023], Lu et al. [2023]. Their main drawback is inherently slow sampling due to many reverse-diffusion steps. To accelerate inference, methods like DDIM Song et al. [2020a] reduce steps via subsequence sampling, while DPM-Solver Lu et al. [2022] uses an optimized ODE solver to reach  $\sim 10$  steps. Useful extensions to safety-critical settings include the cost-constrained diffuser framework of Lin et al. [2023], SafeDiffuser Xiao et al. [2023] and OASIS’s conditional diffusion for dataset synthesis and careful distribution shaping Yao et al. [2024].



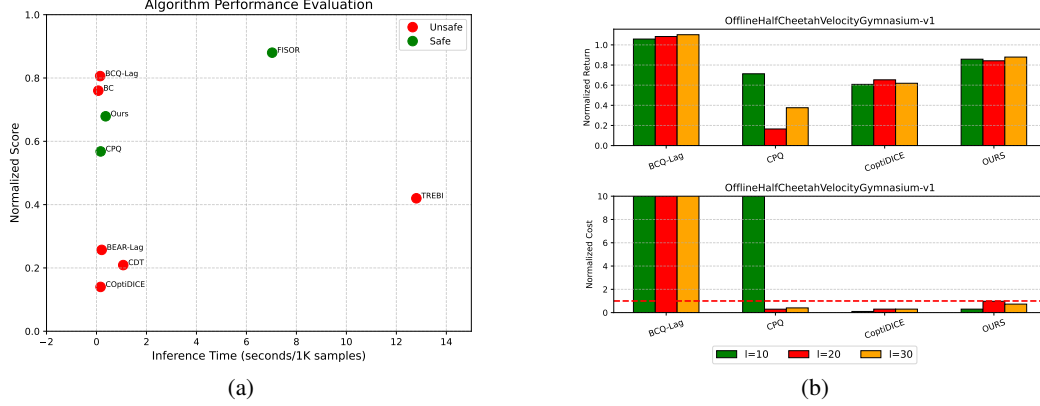

Figure 2: (a) Computational Efficiency vs. Performance Trade-off. Normalized score ( $y$ -axis, combining reward and safety metrics) versus inference time for generating 1,000 actions ( $x$ -axis). (b) Normalized return and cost under varying cost limits ( $l = 10, 20, 30$ ). Since the cost is normalized relative to the corresponding cost limits, the safety threshold is consistently 1.0. The dashed line represents the safety boundary.

334 **Online Safe RL.** Safe RL in online environments has been extensively surveyed in Gu et al. [2024c].  
 335 A common approach is constrained policy optimization—e.g., CPO Achiam et al. [2017] integrates  
 336 TRPO Schulman [2015] for robust updates, and CRPO Xu et al. [2021] obviates complex dual-  
 337 variable tuning. Primal–dual Lagrangian methods dynamically adjust multipliers on the fly to enforce  
 338 safety criteria [Chow et al., 2018, Calian et al., 2020, Ding et al., 2020, Ying et al., 2022, Zhou et al.,  
 339 2023], and more recent algorithms aim to better balance cost and reward via gradient manipulation  
 340 Gu et al. [2024a] or refined trust-region formulations Kim et al. [2023, 2024]. However, these  
 341 methods depend on extensive environment interaction and accurate critic estimates, thus limiting  
 342 their practicality under stringent real-world safety and data collection cost constraints.

343 **Safe Offline RL.** Considering safety specifically in the offline learning setting, Xu et al. [2022], Guan  
 344 et al. [2023] penalized OOD and unsafe actions identified in the dataset. Diffusion-based safe policy  
 345 learning was adapted by Lin et al. [2023] for cost-constrained scenarios, and decision-transformer  
 346 architectures have been applied to safety considerations via Liu et al. [2023b]. Energy-based diffusion  
 347 policies can enforce hard constraints, for example, through weighted regression [Lu et al., 2023,  
 348 Zheng et al., 2024, Koirala et al., 2024]. More recent approaches learn by modelling conditional  
 349 sequences as in Gong et al. [2025], Zhang et al. [2023] or by strategically sharing representations  
 350 across constraints for improved adaptation Chemingui et al. [2025].

## 351 7 Conclusion and Limitations

352 We present DRCORL, a novel approach for offline constrained reinforcement learning that learns  
 353 safe, high-performance policies from fixed datasets. DRCORL employs diffusion models to faithfully  
 354 capture offline behavioral policies and distills them into simplified policies for fast inference. To  
 355 balance reward maximization and constraint satisfaction, we utilize a gradient manipulation strategy  
 356 that adapts dynamically without extensive hyperparameter tuning. Extensive experiments across  
 357 standard safety benchmarks show that DRCORL consistently outperforms existing offline safe RL  
 358 methods, achieving superior rewards while satisfying safety constraints.

359 We also identify several limitations offering avenues for future work. First, DRCORL’s pretraining  
 360 stage comprising diffusion-model training and critic estimation, though producing lightweight policy  
 361 at inference and avoids unsafe online exploration, incurs additional computational overhead. Future  
 362 work should aim to optimize and parallelize the pretraining phase to further reduce its cost. Second,  
 363 guaranteeing zero constraint violations remains challenging in offline RL, particularly when dataset  
 364 quality and coverage vary. Developing methods with greater robustness to imperfect data and tighter  
 365 safety guarantees is a promising direction. Despite these challenges, our contributions lay a strong  
 366 foundation for advancing both generalization and safety in constrained offline reinforcement learning.

## References

- Joshua Achiam, David Held, Aviv Tamar, and Pieter Abbeel. Constrained policy optimization. In *International conference on machine learning*, pages 22–31. PMLR, 2017.
- Alekh Agarwal, Sham M Kakade, Jason D Lee, and Gaurav Mahajan. On the theory of policy gradient methods: Optimality, approximation, and distribution shift. *Journal of Machine Learning Research*, 22(98):1–76, 2021.
- Anurag Ajay, Yilun Du, Abhi Gupta, Joshua Tenenbaum, Tommi Jaakkola, and Pulkit Agrawal. Is conditional generative modeling all you need for decision-making? *arXiv preprint arXiv:2211.15657*, 2022.
- Eitan Altman. *Constrained Markov decision processes*. Routledge, 2021.
- Dan A Calian, Daniel J Mankowitz, Tom Zahavy, Zhongwen Xu, Junhyuk Oh, Nir Levine, and Timothy Mann. Balancing constraints and rewards with meta-gradient d4pg. In *International Conference on Learning Representations*, 2020.
- Yassine Chemingui, Aryan Deshwal, Honghao Wei, Alan Fern, and Jana Doppa. Constraint-adaptive policy switching for offline safe reinforcement learning. In *Proceedings of the AAAI Conference on Artificial Intelligence*, volume 39, pages 15722–15730, 2025.
- Huayu Chen, Cheng Lu, Zhengyi Wang, Hang Su, and Jun Zhu. Score regularized policy optimization through diffusion behavior. *arXiv preprint arXiv:2310.07297*, 2023.
- Jinglin Chen and Nan Jiang. Information-theoretic considerations in batch reinforcement learning. In *International Conference on Machine Learning*, pages 1042–1051. PMLR, 2019.
- Lili Chen, Kevin Lu, Aravind Rajeswaran, Kimin Lee, Aditya Grover, Misha Laskin, Pieter Abbeel, Aravind Srinivas, and Igor Mordatch. Decision transformer: Reinforcement learning via sequence modeling. *Advances in neural information processing systems*, 34:15084–15097, 2021.
- Tianyu Chen, Zhendong Wang, and Mingyuan Zhou. Diffusion policies creating a trust region for offline reinforcement learning. *arXiv preprint arXiv:2405.19690*, 2024.
- Cheng Chi, Zhenjia Xu, Siyuan Feng, Eric Cousineau, Yilun Du, Benjamin Burchfiel, Russ Tedrake, and Shuran Song. Diffusion policy: Visuomotor policy learning via action diffusion. *The International Journal of Robotics Research*, page 02783649241273668, 2023.
- Yinlam Chow, Mohammad Ghavamzadeh, Lucas Janson, and Marco Pavone. Risk-constrained reinforcement learning with percentile risk criteria. *Journal of Machine Learning Research*, 18(167):1–51, 2018.
- Imre Csiszár and János Körner. *Information theory: coding theorems for discrete memoryless systems*. Cambridge University Press, 2011.
- Valentin De Bortoli. Convergence of denoising diffusion models under the manifold hypothesis. *arXiv preprint arXiv:2208.05314*, 2022.
- Dongsheng Ding, Kaiqing Zhang, Tamer Basar, and Mihailo Jovanovic. Natural policy gradient primal-dual method for constrained markov decision processes. *Advances in Neural Information Processing Systems*, 33:8378–8390, 2020.
- Dongsheng Ding, Xiaohan Wei, Zhuoran Yang, Zhaoran Wang, and Mihailo Jovanovic. Provably efficient safe exploration via primal-dual policy optimization. In *International conference on artificial intelligence and statistics*, pages 3304–3312. PMLR, 2021.
- Linjiajie Fang, Ruoxue Liu, Jing Zhang, Wenjia Wang, and Bing-Yi Jing. Diffusion actor-critic: Formulating constrained policy iteration as diffusion noise regression for offline reinforcement learning. *arXiv preprint arXiv:2405.20555*, 2024.
- Scott Fujimoto and Shixiang Shane Gu. A minimalist approach to offline reinforcement learning. *Advances in neural information processing systems*, 34:20132–20145, 2021.

413 Scott Fujimoto, David Meger, and Doina Precup. Off-policy deep reinforcement learning without  
414 exploration. In *International conference on machine learning*, pages 2052–2062. PMLR, 2019.

415 Milan Ganai, Zheng Gong, Chenning Yu, Sylvia Herbert, and Sicun Gao. Iterative reachability  
416 estimation for safe reinforcement learning. *Advances in Neural Information Processing Systems*,  
417 36, 2024.

418 Ze Gong, Akshat Kumar, and Pradeep Varakantham. Offline safe reinforcement learning using trajec-  
419 tory classification. In *Proceedings of the AAAI Conference on Artificial Intelligence*, volume 39,  
420 pages 16880–16887, 2025.

421 Sven Gronauer. Bullet-safety-gym: A framework for constrained reinforcement learning. Technical  
422 report, mediaTUM, 2022.

423 Shangding Gu, Bilgehan Sel, Yuhao Ding, Lu Wang, Qingwei Lin, Ming Jin, and Alois Knoll.  
424 Balance reward and safety optimization for safe reinforcement learning: A perspective of gradient  
425 manipulation. In *Proceedings of the AAAI Conference on Artificial Intelligence*, volume 38, pages  
426 21099–21106, 2024a.

427 Shangding Gu, Laixi Shi, Yuhao Ding, Alois Knoll, Costas Spanos, Adam Wierman, and Ming Jin.  
428 Enhancing efficiency of safe reinforcement learning via sample manipulation. *NeurIPS*, 2024b.

429 Shangding Gu, Long Yang, Yali Du, Guang Chen, Florian Walter, Jun Wang, and Alois Knoll. A  
430 review of safe reinforcement learning: Methods, theories and applications. *IEEE Transactions on*  
431 *Pattern Analysis and Machine Intelligence*, 2024c.

432 Jiayi Guan, Guang Chen, Jiaming Ji, Long Yang, Zhijun Li, et al. Voce: Variational optimization with  
433 conservative estimation for offline safe reinforcement learning. *Advances in Neural Information*  
434 *Processing Systems*, 36:33758–33780, 2023.

435 Zijian Guo, Weichao Zhou, Shengao Wang, and Wenchao Li. Constraint-conditioned actor-critic  
436 for offline safe reinforcement learning. In *The Thirteenth International Conference on Learning*  
437 *Representations*, 2025.

438 Philippe Hansen-Estruch, Ilya Kostrikov, Michael Janner, Jakub Grudzien Kuba, and Sergey Levine.  
439 Idql: Implicit q-learning as an actor-critic method with diffusion policies. *arXiv preprint*  
440 *arXiv:2304.10573*, 2023.

441 Botao Hao, Yasin Abbasi Yadkori, Zheng Wen, and Guang Cheng. Bootstrapping upper confidence  
442 bound. *Advances in neural information processing systems*, 32, 2019.

443 Haoran He, Chenjia Bai, Kang Xu, Zhuoran Yang, Weinan Zhang, Dong Wang, Bin Zhao, and Xue-  
444 long Li. Diffusion model is an effective planner and data synthesizer for multi-task reinforcement  
445 learning. *Advances in neural information processing systems*, 36, 2024.

446 Jonathan Ho, Ajay Jain, and Pieter Abbeel. Denoising diffusion probabilistic models. *Advances in*  
447 *neural information processing systems*, 33:6840–6851, 2020.

448 Michael Janner, Yilun Du, Joshua B Tenenbaum, and Sergey Levine. Planning with diffusion for  
449 flexible behavior synthesis. *arXiv preprint arXiv:2205.09991*, 2022.

450 Sham Kakade and John Langford. Approximately optimal approximate reinforcement learning. In  
451 *Proceedings of the Nineteenth International Conference on Machine Learning*, pages 267–274,  
452 2002.

453 Dohyeong Kim, Kyungjae Lee, and Songhwai Oh. Trust region-based safe distributional reinforce-  
454 ment learning for multiple constraints. *Advances in neural information processing systems*, 36:  
455 19908–19939, 2023.

456 Dohyeong Kim, Mineui Hong, Jeongho Park, and Songhwai Oh. Scale-invariant gradient aggregation  
457 for constrained multi-objective reinforcement learning. *arXiv e-prints*, pages arXiv–2403, 2024.

458 Diederik P Kingma. Auto-encoding variational bayes. *arXiv preprint arXiv:1312.6114*, 2013.

459 Prajwal Koirala, Zhanhong Jiang, Soumik Sarkar, and Cody Fleming. Fawac: Feasibility informed  
460 advantage weighted regression for persistent safety in offline reinforcement learning. *arXiv preprint*  
461 *arXiv:2412.08880*, 2024.

462 Ilya Kostrikov, Ashvin Nair, and Sergey Levine. Offline reinforcement learning with implicit  
463 q-learning. *arXiv preprint arXiv:2110.06169*, 2021.

464 Aviral Kumar, Justin Fu, Matthew Soh, George Tucker, and Sergey Levine. Stabilizing off-policy  
465 q-learning via bootstrapping error reduction. *Advances in neural information processing systems*,  
466 32, 2019.

467 Jongmin Lee, Cosmin Paduraru, Daniel J Mankowitz, Nicolas Heess, Doina Precup, Kee-Eung Kim,  
468 and Arthur Guez. Coptidice: Offline constrained reinforcement learning via stationary distribution  
469 correction estimation. *arXiv preprint arXiv:2204.08957*, 2022.

470 Sergey Levine, Aviral Kumar, George Tucker, and Justin Fu. Offline reinforcement learning: Tutorial,  
471 review, and perspectives on open problems. *arXiv preprint arXiv:2005.01643*, 2020.

472 Qian Lin, Bo Tang, Zifan Wu, Chao Yu, Shangqin Mao, Qianlong Xie, Xingxing Wang, and Dong  
473 Wang. Safe offline reinforcement learning with real-time budget constraints. In *International*  
474 *Conference on Machine Learning*, pages 21127–21152. PMLR, 2023.

475 Zuxin Liu, Zhepeng Cen, Vladislav Isenbaev, Wei Liu, Steven Wu, Bo Li, and Ding Zhao. Constrained  
476 variational policy optimization for safe reinforcement learning. In *International Conference on*  
477 *Machine Learning*, pages 13644–13668. PMLR, 2022.

478 Zuxin Liu, Zijian Guo, Haohong Lin, Yihang Yao, Jiacheng Zhu, Zhepeng Cen, Hanjiang Hu, Wenhao  
479 Yu, Tingnan Zhang, Jie Tan, et al. Datasets and benchmarks for offline safe reinforcement learning.  
480 *arXiv preprint arXiv:2306.09303*, 2023a.

481 Zuxin Liu, Zijian Guo, Yihang Yao, Zhepeng Cen, Wenhao Yu, Tingnan Zhang, and Ding Zhao. Con-  
482 strained decision transformer for offline safe reinforcement learning. In *International Conference*  
483 *on Machine Learning*, pages 21611–21630. PMLR, 2023b.

484 Zuxin Liu, Zijian Guo, Haohong Lin, Yihang Yao, Jiacheng Zhu, Zhepeng Cen, Hanjiang Hu,  
485 Wenhao Yu, Tingnan Zhang, Jie Tan, and Ding Zhao. Datasets and benchmarks for offline safe  
486 reinforcement learning. *Journal of Data-centric Machine Learning Research*, 2024.

487 Cheng Lu, Yuhao Zhou, Fan Bao, Jianfei Chen, Chongxuan Li, and Jun Zhu. Dpm-solver: A fast  
488 ode solver for diffusion probabilistic model sampling in around 10 steps. *Advances in Neural*  
489 *Information Processing Systems*, 35:5775–5787, 2022.

490 Cheng Lu, Huayu Chen, Jianfei Chen, Hang Su, Chongxuan Li, and Jun Zhu. Contrastive energy  
491 prediction for exact energy-guided diffusion sampling in offline reinforcement learning. In  
492 *International Conference on Machine Learning*, pages 22825–22855. PMLR, 2023.

493 Jiafei Lyu, Xiaoteng Ma, Xiu Li, and Zongqing Lu. Mildly conservative q-learning for offline  
494 reinforcement learning. *Advances in Neural Information Processing Systems*, 35:1711–1724, 2022.

495 Santiago Paternain, Miguel Calvo-Fullana, Luiz FO Chamon, and Alejandro Ribeiro. Safe policies  
496 for reinforcement learning via primal-dual methods. *IEEE Transactions on Automatic Control*, 68  
497 (3):1321–1336, 2022.

498 Alex Ray, Joshua Achiam, and Dario Amodei. Benchmarking safe exploration in deep reinforcement  
499 learning. *arXiv preprint arXiv:1910.01708*, 7(1):2, 2019.

500 John Schulman. Trust region policy optimization. *arXiv preprint arXiv:1502.05477*, 2015.

501 Tianyu Shi, Dong Chen, Kaian Chen, and Zhaojian Li. Offline reinforcement learning for autonomous  
502 driving with safety and exploration enhancement. *arXiv preprint arXiv:2110.07067*, 2021.

503 Jascha Sohl-Dickstein, Eric Weiss, Niru Maheswaranathan, and Surya Ganguli. Deep unsupervised  
504 learning using nonequilibrium thermodynamics. In *International conference on machine learning*,  
505 pages 2256–2265. PMLR, 2015.

506 Kihyuk Sohn, Honglak Lee, and Xinchun Yan. Learning structured output representation using deep  
507 conditional generative models. *Advances in neural information processing systems*, 28, 2015.

508 Jiaming Song, Chenlin Meng, and Stefano Ermon. Denoising diffusion implicit models. *arXiv preprint arXiv:2010.02502*, 2020a.

510 Yang Song, Jascha Sohl-Dickstein, Diederik P Kingma, Abhishek Kumar, Stefano Ermon, and Ben  
511 Poole. Score-based generative modeling through stochastic differential equations. *arXiv preprint*  
512 *arXiv:2011.13456*, 2020b.

513 Adam Stooke, Joshua Achiam, and Pieter Abbeel. Responsive safety in reinforcement learning by  
514 pid lagrangian methods. In *International Conference on Machine Learning*, pages 9133–9143.  
515 PMLR, 2020.

516 Richard S Sutton. Learning to predict by the methods of temporal differences. *Machine learning*, 3:  
517 9–44, 1988.

518 Sebastian Thrun and Anton Schwartz. Issues in using function approximation for reinforcement  
519 learning. In *Proceedings of the 1993 connectionist models summer school*, pages 255–263.  
520 Psychology Press, 2014.

521 Zhendong Wang, Jonathan J Hunt, and Mingyuan Zhou. Diffusion policies as an expressive policy  
522 class for offline reinforcement learning. *arXiv preprint arXiv:2208.06193*, 2022.

523 Yifan Wu, George Tucker, and Ofir Nachum. Behavior regularized offline reinforcement learning.  
524 *arXiv preprint arXiv:1911.11361*, 2019.

525 Zifan Wu, Bo Tang, Qian Lin, Chao Yu, Shangqin Mao, Qianlong Xie, Xingxing Wang, and Dong  
526 Wang. Off-policy primal-dual safe reinforcement learning. In *The Twelfth International Conference*  
527 *on Learning Representations*, 2024.

528 Wei Xiao, Tsun-Hsuan Wang, Chuang Gan, and Daniela Rus. Safediffuser: Safe planning with  
529 diffusion probabilistic models. *arXiv preprint arXiv:2306.00148*, 2023.

530 Haoran Xu, Xianyu Zhan, and Xiangyu Zhu. Constraints penalized q-learning for safe offline rein-  
531 forcement learning. In *Proceedings of the AAAI Conference on Artificial Intelligence*, volume 36,  
532 pages 8753–8760, 2022.

533 Tengyu Xu, Yingbin Liang, and Guanghui Lan. Crpo: A new approach for safe reinforcement  
534 learning with convergence guarantee. In *International Conference on Machine Learning*, pages  
535 11480–11491. PMLR, 2021.

536 Tsung-Yen Yang, Justinian Rosca, Karthik Narasimhan, and Peter J Ramadge. Projection-based  
537 constrained policy optimization. *arXiv preprint arXiv:2010.03152*, 2020.

538 Yihang Yao, Zhepeng Cen, Wenhao Ding, Haohong Lin, Shiqi Liu, Tingnan Zhang, Wenhao Yu,  
539 and Ding Zhao. Oasis: Conditional distribution shaping for offline safe reinforcement learning.  
540 *Advances in Neural Information Processing Systems*, 37:78451–78478, 2024.

541 Donghao Ying, Yuhao Ding, and Javad Lavaei. A dual approach to constrained markov decision  
542 processes with entropy regularization. In *International Conference on Artificial Intelligence and*  
543 *Statistics*, pages 1887–1909. PMLR, 2022.

544 Qin Zhang, Linrui Zhang, Haoran Xu, Li Shen, Bowen Wang, Yongzhe Chang, Xueqian Wang,  
545 Bo Yuan, and Dacheng Tao. Saformer: A conditional sequence modeling approach to offline safe  
546 reinforcement learning. *arXiv preprint arXiv:2301.12203*, 2023.

547 Yinan Zheng, Jianxiong Li, Dongjie Yu, Yujie Yang, Shengbo Eben Li, Xianyu Zhan, and Jingjing  
548 Liu. Safe offline reinforcement learning with feasibility-guided diffusion model. In *The Twelfth*  
549 *International Conference on Learning Representations*, 2024.

550 Zixian Zhou, Mengda Huang, Feiyang Pan, Jia He, Xiang Ao, Dandan Tu, and Qing He. Gradient-  
551 adaptive pareto optimization for constrained reinforcement learning. In *Proceedings of the AAAI*  
552 *Conference on Artificial Intelligence*, volume 37, pages 11443–11451, 2023.

## NeurIPS Paper Checklist

### 1. Claims

Question: Do the main claims made in the abstract and introduction accurately reflect the paper's contributions and scope?

Answer: [\[Yes\]](#)

Justification: Proof for the results and the statements made in the abstract and introduction are given in the main body and appendix section.

Guidelines:

- The answer NA means that the abstract and introduction do not include the claims made in the paper.
- The abstract and/or introduction should clearly state the claims made, including the contributions made in the paper and important assumptions and limitations. A No or NA answer to this question will not be perceived well by the reviewers.
- The claims made should match theoretical and experimental results, and reflect how much the results can be expected to generalize to other settings.
- It is fine to include aspirational goals as motivation as long as it is clear that these goals are not attained by the paper.

### 2. Limitations

Question: Does the paper discuss the limitations of the work performed by the authors?

Answer: [\[Yes\]](#)

Justification: Limitation of the work is discussed in the conclusion part of the paper.

Guidelines:

- The answer NA means that the paper has no limitation while the answer No means that the paper has limitations, but those are not discussed in the paper.
- The authors are encouraged to create a separate "Limitations" section in their paper.
- The paper should point out any strong assumptions and how robust the results are to violations of these assumptions (e.g., independence assumptions, noiseless settings, model well-specification, asymptotic approximations only holding locally). The authors should reflect on how these assumptions might be violated in practice and what the implications would be.
- The authors should reflect on the scope of the claims made, e.g., if the approach was only tested on a few datasets or with a few runs. In general, empirical results often depend on implicit assumptions, which should be articulated.
- The authors should reflect on the factors that influence the performance of the approach. For example, a facial recognition algorithm may perform poorly when image resolution is low or images are taken in low lighting. Or a speech-to-text system might not be used reliably to provide closed captions for online lectures because it fails to handle technical jargon.
- The authors should discuss the computational efficiency of the proposed algorithms and how they scale with dataset size.
- If applicable, the authors should discuss possible limitations of their approach to address problems of privacy and fairness.
- While the authors might fear that complete honesty about limitations might be used by reviewers as grounds for rejection, a worse outcome might be that reviewers discover limitations that aren't acknowledged in the paper. The authors should use their best judgment and recognize that individual actions in favor of transparency play an important role in developing norms that preserve the integrity of the community. Reviewers will be specifically instructed to not penalize honesty concerning limitations.

### 3. Theory assumptions and proofs

Question: For each theoretical result, does the paper provide the full set of assumptions and a complete (and correct) proof?

Answer: [\[Yes\]](#)

Justification: Assumptions are mentioned right before the statements of the theoretical results. Proofs are mainly provided in the appendix due to space limits.

Guidelines:

- The answer NA means that the paper does not include theoretical results.
- All the theorems, formulas, and proofs in the paper should be numbered and cross-referenced.
- All assumptions should be clearly stated or referenced in the statement of any theorems.
- The proofs can either appear in the main paper or the supplemental material, but if they appear in the supplemental material, the authors are encouraged to provide a short proof sketch to provide intuition.
- Inversely, any informal proof provided in the core of the paper should be complemented by formal proofs provided in appendix or supplemental material.
- Theorems and Lemmas that the proof relies upon should be properly referenced.

#### 4. Experimental result reproducibility

Question: Does the paper fully disclose all the information needed to reproduce the main experimental results of the paper to the extent that it affects the main claims and/or conclusions of the paper (regardless of whether the code and data are provided or not)?

Answer: [\[Yes\]](#)

Justification: We provide all the essential experimental setting to reproduce the experimental results covered in the main results, including the choice of hyperparameters, experimental configurations and so on. Algorithms can be implemented using the open-source benchmark OSRL Liu et al. [2024].

Guidelines:

- The answer NA means that the paper does not include experiments.
- If the paper includes experiments, a No answer to this question will not be perceived well by the reviewers: Making the paper reproducible is important, regardless of whether the code and data are provided or not.
- If the contribution is a dataset and/or model, the authors should describe the steps taken to make their results reproducible or verifiable.
- Depending on the contribution, reproducibility can be accomplished in various ways. For example, if the contribution is a novel architecture, describing the architecture fully might suffice, or if the contribution is a specific model and empirical evaluation, it may be necessary to either make it possible for others to replicate the model with the same dataset, or provide access to the model. In general, releasing code and data is often one good way to accomplish this, but reproducibility can also be provided via detailed instructions for how to replicate the results, access to a hosted model (e.g., in the case of a large language model), releasing of a model checkpoint, or other means that are appropriate to the research performed.
- While NeurIPS does not require releasing code, the conference does require all submissions to provide some reasonable avenue for reproducibility, which may depend on the nature of the contribution. For example
  - (a) If the contribution is primarily a new algorithm, the paper should make it clear how to reproduce that algorithm.
  - (b) If the contribution is primarily a new model architecture, the paper should describe the architecture clearly and fully.
  - (c) If the contribution is a new model (e.g., a large language model), then there should either be a way to access this model for reproducing the results or a way to reproduce the model (e.g., with an open-source dataset or instructions for how to construct the dataset).
  - (d) We recognize that reproducibility may be tricky in some cases, in which case authors are welcome to describe the particular way they provide for reproducibility. In the case of closed-source models, it may be that access to the model is limited in some way (e.g., to registered users), but it should be possible for other researchers to have some path to reproducing or verifying the results.

## 5. Open access to data and code

Question: Does the paper provide open access to the data and code, with sufficient instructions to faithfully reproduce the main experimental results, as described in supplemental material?

Answer: [No]

Justification: We will release and open-source the code and training logs after the review process.

Guidelines:

- The answer NA means that paper does not include experiments requiring code.
- Please see the NeurIPS code and data submission guidelines (<https://nips.cc/public/guides/CodeSubmissionPolicy>) for more details.
- While we encourage the release of code and data, we understand that this might not be possible, so “No” is an acceptable answer. Papers cannot be rejected simply for not including code, unless this is central to the contribution (e.g., for a new open-source benchmark).
- The instructions should contain the exact command and environment needed to run to reproduce the results. See the NeurIPS code and data submission guidelines (<https://nips.cc/public/guides/CodeSubmissionPolicy>) for more details.
- The authors should provide instructions on data access and preparation, including how to access the raw data, preprocessed data, intermediate data, and generated data, etc.
- The authors should provide scripts to reproduce all experimental results for the new proposed method and baselines. If only a subset of experiments are reproducible, they should state which ones are omitted from the script and why.
- At submission time, to preserve anonymity, the authors should release anonymized versions (if applicable).
- Providing as much information as possible in supplemental material (appended to the paper) is recommended, but including URLs to data and code is permitted.

## 6. Experimental setting/details

Question: Does the paper specify all the training and test details (e.g., data splits, hyper-parameters, how they were chosen, type of optimizer, etc.) necessary to understand the results?

Answer: [Yes]

Justification: We specify the settings of experiments in Appendix C.

Guidelines:

- The answer NA means that the paper does not include experiments.
- The experimental setting should be presented in the core of the paper to a level of detail that is necessary to appreciate the results and make sense of them.
- The full details can be provided either with the code, in appendix, or as supplemental material.

## 7. Experiment statistical significance

Question: Does the paper report error bars suitably and correctly defined or other appropriate information about the statistical significance of the experiments?

Answer: [Yes]

Justification: We do not report error bars directly, instead we run five seeds on each task and report the average performance across five seeds to reduce randomness.

Guidelines:

- The answer NA means that the paper does not include experiments.
- The authors should answer "Yes" if the results are accompanied by error bars, confidence intervals, or statistical significance tests, at least for the experiments that support the main claims of the paper.



- The factors of variability that the error bars are capturing should be clearly stated (for example, train/test split, initialization, random drawing of some parameter, or overall run with given experimental conditions).
- The method for calculating the error bars should be explained (closed form formula, call to a library function, bootstrap, etc.)
- The assumptions made should be given (e.g., Normally distributed errors).
- It should be clear whether the error bar is the standard deviation or the standard error of the mean.
- It is OK to report 1-sigma error bars, but one should state it. The authors should preferably report a 2-sigma error bar than state that they have a 96% CI, if the hypothesis of Normality of errors is not verified.
- For asymmetric distributions, the authors should be careful not to show in tables or figures symmetric error bars that would yield results that are out of range (e.g. negative error rates).
- If error bars are reported in tables or plots, The authors should explain in the text how they were calculated and reference the corresponding figures or tables in the text.

## 8. Experiments compute resources

Question: For each experiment, does the paper provide sufficient information on the computer resources (type of compute workers, memory, time of execution) needed to reproduce the experiments?

Answer: [Yes]

Justification: We indicate the type of compute workers and the amount of compute required for each individual experimental runs in the Appendix C. We also disclose that the full research project require the same compute as reported in the paper.

Guidelines:

- The answer NA means that the paper does not include experiments.
- The paper should indicate the type of compute workers CPU or GPU, internal cluster, or cloud provider, including relevant memory and storage.
- The paper should provide the amount of compute required for each of the individual experimental runs as well as estimate the total compute.
- The paper should disclose whether the full research project required more compute than the experiments reported in the paper (e.g., preliminary or failed experiments that didn't make it into the paper).

## 9. Code of ethics

Question: Does the research conducted in the paper conform, in every respect, with the NeurIPS Code of Ethics <https://neurips.cc/public/EthicsGuidelines>?

Answer: [Yes]

Justification: The paper strictly adheres to the NeurIPS Code of Ethics.

Guidelines:

- The answer NA means that the authors have not reviewed the NeurIPS Code of Ethics.
- If the authors answer No, they should explain the special circumstances that require a deviation from the Code of Ethics.
- The authors should make sure to preserve anonymity (e.g., if there is a special consideration due to laws or regulations in their jurisdiction).

## 10. Broader impacts

Question: Does the paper discuss both potential positive societal impacts and negative societal impacts of the work performed?

Answer: [NA]

Justification: There is no societal impact of the work performed.

Guidelines:

- The answer NA means that there is no societal impact of the work performed.

- If the authors answer NA or No, they should explain why their work has no societal impact or why the paper does not address societal impact.
- Examples of negative societal impacts include potential malicious or unintended uses (e.g., disinformation, generating fake profiles, surveillance), fairness considerations (e.g., deployment of technologies that could make decisions that unfairly impact specific groups), privacy considerations, and security considerations.
- The conference expects that many papers will be foundational research and not tied to particular applications, let alone deployments. However, if there is a direct path to any negative applications, the authors should point it out. For example, it is legitimate to point out that an improvement in the quality of generative models could be used to generate deepfakes for disinformation. On the other hand, it is not needed to point out that a generic algorithm for optimizing neural networks could enable people to train models that generate Deepfakes faster.
- The authors should consider possible harms that could arise when the technology is being used as intended and functioning correctly, harms that could arise when the technology is being used as intended but gives incorrect results, and harms following from (intentional or unintentional) misuse of the technology.
- If there are negative societal impacts, the authors could also discuss possible mitigation strategies (e.g., gated release of models, providing defenses in addition to attacks, mechanisms for monitoring misuse, mechanisms to monitor how a system learns from feedback over time, improving the efficiency and accessibility of ML).

## 11. Safeguards

Question: Does the paper describe safeguards that have been put in place for responsible release of data or models that have a high risk for misuse (e.g., pretrained language models, image generators, or scraped datasets)?

Answer: [NA]

Justification: This work poses no such risks

Guidelines:

- The answer NA means that the paper poses no such risks.
- Released models that have a high risk for misuse or dual-use should be released with necessary safeguards to allow for controlled use of the model, for example by requiring that users adhere to usage guidelines or restrictions to access the model or implementing safety filters.
- Datasets that have been scraped from the Internet could pose safety risks. The authors should describe how they avoided releasing unsafe images.
- We recognize that providing effective safeguards is challenging, and many papers do not require this, but we encourage authors to take this into account and make a best faith effort.

## 12. Licenses for existing assets

Question: Are the creators or original owners of assets (e.g., code, data, models), used in the paper, properly credited and are the license and terms of use explicitly mentioned and properly respected?

Answer: [NA]

Justification: This work does not use such existing assets.

Guidelines:

- The answer NA means that the paper does not use existing assets.
- The authors should cite the original paper that produced the code package or dataset.
- The authors should state which version of the asset is used and, if possible, include a URL.
- The name of the license (e.g., CC-BY 4.0) should be included for each asset.
- For scraped data from a particular source (e.g., website), the copyright and terms of service of that source should be provided.

- If assets are released, the license, copyright information, and terms of use in the package should be provided. For popular datasets, [paperswithcode.com/datasets](https://paperswithcode.com/datasets) has curated licenses for some datasets. Their licensing guide can help determine the license of a dataset.
- For existing datasets that are re-packaged, both the original license and the license of the derived asset (if it has changed) should be provided.
- If this information is not available online, the authors are encouraged to reach out to the asset's creators.

### 13. New assets

Question: Are new assets introduced in the paper well documented and is the documentation provided alongside the assets?

Answer: [NA]

Justification: This work does not release new assets.

Guidelines:

- The answer NA means that the paper does not release new assets.
- Researchers should communicate the details of the dataset/code/model as part of their submissions via structured templates. This includes details about training, license, limitations, etc.
- The paper should discuss whether and how consent was obtained from people whose asset is used.
- At submission time, remember to anonymize your assets (if applicable). You can either create an anonymized URL or include an anonymized zip file.

### 14. Crowdsourcing and research with human subjects

Question: For crowdsourcing experiments and research with human subjects, does the paper include the full text of instructions given to participants and screenshots, if applicable, as well as details about compensation (if any)?

Answer: [NA]

Justification: This work does not involve crowdsourcing nor research with human subjects

Guidelines:

- The answer NA means that the paper does not involve crowdsourcing nor research with human subjects.
- Including this information in the supplemental material is fine, but if the main contribution of the paper involves human subjects, then as much detail as possible should be included in the main paper.
- According to the NeurIPS Code of Ethics, workers involved in data collection, curation, or other labor should be paid at least the minimum wage in the country of the data collector.

### 15. Institutional review board (IRB) approvals or equivalent for research with human subjects

Question: Does the paper describe potential risks incurred by study participants, whether such risks were disclosed to the subjects, and whether Institutional Review Board (IRB) approvals (or an equivalent approval/review based on the requirements of your country or institution) were obtained?

Answer: [NA]

Justification: This work does not involve crowdsourcing nor research with human subjects.

Guidelines:

- The answer NA means that the paper does not involve crowdsourcing nor research with human subjects.
- Depending on the country in which research is conducted, IRB approval (or equivalent) may be required for any human subjects research. If you obtained IRB approval, you should clearly state this in the paper.

- 863           • We recognize that the procedures for this may vary significantly between institutions  
864           and locations, and we expect authors to adhere to the NeurIPS Code of Ethics and the  
865           guidelines for their institution.  
866           • For initial submissions, do not include any information that would break anonymity (if  
867           applicable), such as the institution conducting the review.

868 **16. Declaration of LLM usage**

869       Question: Does the paper describe the usage of LLMs if it is an important, original, or  
870       non-standard component of the core methods in this research? Note that if the LLM is used  
871       only for writing, editing, or formatting purposes and does not impact the core methodology,  
872       scientific rigorousness, or originality of the research, declaration is not required.

873       Answer: [NA]

874       Justification: This work’s core method does not involve LLM as any important, original or  
875       non-standard components.

876       Guidelines:

- 877           • The answer NA means that the core method development in this research does not  
878           involve LLMs as any important, original, or non-standard components.  
879           • Please refer to our LLM policy (<https://neurips.cc/Conferences/2025/LLM>)  
880           for what should or should not be described.

## 881 A Proofs of Theoretical Results

882 In this section, we provide the proof of the theoretical results in the main body. We make this  
883 assumption throughout the proof of Proposition 3.1 and Theorem 3.1.

884 **Assumption A.1.** *During the training process, we assume the policy  $\pi_\theta$  resides in the region  $\Pi_\Theta$*   
885 *within the policy space. For all  $\pi \in \Pi_\Theta$ ,  $s \in \mathcal{S}$ , and  $a \in \mathcal{A}$ , the following holds:*

$$\left| \log \frac{\pi(a|s)}{\pi_b(a|s)} \right| \leq \epsilon_{\text{dist}}. \quad (22)$$

886 Equivalently, it means that for all  $s \in \mathcal{S}$  and  $a \in \mathcal{A}$ :

$$\exp(-\epsilon_{\text{dist}}) \leq \frac{\pi(a|s)}{\pi_b(a|s)} \leq \exp(\epsilon_{\text{dist}}). \quad (23)$$

### 887 A.1 Proof of Proposition 3.1

888 *Proof.* Using the performance difference lemma [Agarwal et al., 2021, Lemma 2], we can write the  
889 difference of the value functions under policies  $\tilde{\pi}$  and  $\pi_b$  as

$$V_c^{\pi_b}(\rho) - V_c^{\tilde{\pi}}(\rho) = \frac{1}{1-\gamma} \mathbb{E}_{s \sim d_\rho^{\pi_b}} \mathbb{E}_{a \sim \pi_b(\cdot|s)} [A_c^{\tilde{\pi}}(s, a)], \quad (24)$$

890 where  $d_\rho^{\pi_b}$  is the discounted stationary distribution defined as  $d_\rho^{\pi_b}(s) = (1-\gamma) \sum_{t=0}^{\infty} \Pr(s_t =$   
891  $s | s_0 \sim \rho)$ . The total variation distance (TV-distance) between two distribution is defined as  
892  $D_{\text{TV}}(\tilde{\pi}(\cdot|s) || \pi_b(\cdot|s)) = \frac{1}{2} \int_{\mathcal{A}} |\tilde{\pi}(a|s) - \pi_b(a|s)| da$ , which is proportion to the  $\ell^1$ -distance between  
893 the two distributions. Using the Pinsker's inequality [Csiszár and Körner, 2011], we can bound the  
894 TV-distance with the KL-divergence, i.e., for any two distributions  $\mu, \nu$ , we have that

$$D_{\text{TV}}(\mu || \nu) \leq \sqrt{\frac{D_{\text{KL}}(\mu || \nu)}{2}}. \quad (25)$$

895 Hence, it holds that  $D_{\text{TV}}(\tilde{\pi} || \pi_b) \leq \sqrt{\epsilon_{\text{dist}}/2}$ . Then, following the same procedure as Achiam et al.  
896 [2017, Proposition 2], we can obtain that

$$V_c^{\pi_b}(\rho) - V_c^{\tilde{\pi}}(\rho) \geq \underbrace{\frac{1}{1-\gamma} \mathbb{E}_{s \sim d_\rho^{\tilde{\pi}}} \mathbb{E}_{a \sim \pi_b(\cdot|s)} [A_c^{\tilde{\pi}}(s, a)]}_{\text{I}} - \underbrace{\frac{2\gamma\epsilon_{\text{adv}}^b}{(1-\gamma)^2} \mathbb{E}_{s \sim d_\rho^{\tilde{\pi}}} [D_{\text{TV}}(\tilde{\pi}(\cdot|s) || \pi_b(\cdot|s))]}_{\text{II}}. \quad (26)$$

897 Using Eq. (25), we can bound term II with

$$\frac{2\gamma\epsilon_{\text{adv}}^b}{(1-\gamma)^2} \mathbb{E}_{s \sim d_\rho^{\tilde{\pi}}} [D_{\text{TV}}(\tilde{\pi}(\cdot|s) || \pi_b(\cdot|s))] \leq \frac{\gamma\epsilon_{\text{adv}}^b \sqrt{2\epsilon_{\text{dist}}}}{(1-\gamma)^2}. \quad (27)$$

898 As for term I, we can bound it with

$$\begin{aligned} \left| \frac{1}{1-\gamma} \mathbb{E}_{s \sim d_\rho^{\tilde{\pi}}} \mathbb{E}_{a \sim \pi_b(\cdot|s)} [A_c^{\tilde{\pi}}(s, a)] \right| &\leq \frac{1}{1-\gamma} \mathbb{E}_{s \sim d_\rho^{\tilde{\pi}}} \left| \int_{\mathcal{A}} \pi_b(a|s) Q^{\tilde{\pi}}(s, a) - \tilde{\pi}(a|s) Q^{\tilde{\pi}}(s, a) da \right| \\ &\leq \frac{1}{1-\gamma} \mathbb{E}_{s \sim d_\rho^{\tilde{\pi}}} \int_{\mathcal{A}} |\pi_b(a|s) - \tilde{\pi}(a|s)| \underbrace{Q^{\tilde{\pi}}(s, a)}_{\in [0, \frac{c_{\text{max}}}{1-\gamma}]} da \\ &\leq \frac{c_{\text{max}}}{(1-\gamma)^2} \mathbb{E}_{s \sim d_\rho^{\tilde{\pi}}} \int_{\mathcal{A}} |\tilde{\pi}(a|s) - \pi_b(a|s)| da \\ &\leq \frac{2c_{\text{max}}}{(1-\gamma)^2} \mathbb{E}_{s \sim d_\rho^{\tilde{\pi}}} [D_{\text{TV}}(\tilde{\pi}(\cdot|s) || \pi_b(\cdot|s))] \\ &\leq \frac{c_{\text{max}} \sqrt{2\epsilon_{\text{dist}}}}{(1-\gamma)^2}. \end{aligned} \quad (28)$$

Combining Eq. (28) with Eq. (27), we can finally obtain that

$$V_c^{\pi_b}(\rho) - V_c^{\tilde{\pi}}(\rho) = \text{I} - \text{II} \geq -\frac{c_{\max}\sqrt{2\epsilon_{\text{dist}}}}{(1-\gamma)^2} - \frac{\gamma\epsilon_{\text{adv}}^b\sqrt{2\epsilon_{\text{dist}}}}{(1-\gamma)^2} = -\frac{(c_{\max} + \gamma\epsilon_{\text{adv}}^b)\sqrt{2\epsilon_{\text{dist}}}}{(1-\gamma)^2}, \quad (29)$$

which concludes the proof of Proposition 3.1.  $\blacksquare$

## A.2 Proof of Theorem 3.1

Our proof is based on theorem 1 in Gu et al. [2024b] which is considering a online safe reinforcement learning setting. Before presenting the proof, we first introduce some notations and concepts that will be used throughout this section. We index the iterations of Algorithm 1 by  $t = 1, 2, \dots, T$ .

- Let  $\hat{Q}_r^t(s, a)$  and  $\hat{Q}_c^t(s, a)$  denote the estimators of the critic functions  $Q_r^{\pi_{\theta_t}}(s, a)$  and  $Q_c^{\pi_{\theta_t}}(s, a)$ , respectively, at the  $t$ -th iteration under the policy  $\pi_{\theta_t}$ .
- Denote the gradient at step  $t$  for the reward optimization as  $g_r^t$  and the gradient at step  $t$  for the cost optimization as  $g_c^t$ .
- Let  $\eta$  represent the learning rate for the NPG algorithm.
- We categorize the iterations of Algorithm 1 into four cases based on the optimization scenarios:
  1. **Safe Policy Region**, i.e., when  $V_c^{\pi_{\theta_t}} \leq l - h^-$ . We denote the set of iteration indices corresponding to this case as  $S_{\text{safe}}$ .
  2. **Unsafe Region**, i.e., when  $V_c^{\pi_{\theta_t}} \geq l + h^+$ . We denote the set of iteration indices corresponding to this case as  $S_{\text{unsafe}}$ .
  3. **Gradient Manipulation - Aligned Gradients**, i.e., when the cost function is close to the cost limit threshold and the angle between the updated gradients is less than  $90^\circ$ . We denote the corresponding set of iteration indices as  $S_{\text{align}}$ .
  4. **Gradient Manipulation - Conflicting Gradients**, i.e., when the cost function is close to the cost limit threshold and the angle between the updated gradients is greater than  $90^\circ$ . We denote the corresponding set of iteration indices as  $S_{\text{conflict}}$ .

For every  $t \in \{1, 2, \dots, T\}$ , the iteration index  $t$  must belong to one of the four sets:  $S_{\text{safe}}$ ,  $S_{\text{unsafe}}$ ,  $S_{\text{align}}$ , or  $S_{\text{conflict}}$ .

- Assume the reward function  $r : \mathcal{S} \times \mathcal{A} \rightarrow [0, M]$  and the cost function  $c : \mathcal{S} \times \mathcal{A} \rightarrow [0, M]$  are non-negative and bounded by  $M$ . This is a standard assumption in the tabular setting.
- We define the Bellman operator  $\mathcal{T}$  for policy evaluation (applicable to both cost and reward functions) as:

$$\mathcal{T}f(s, a) = r(s, a) + \gamma \mathbb{E}_{s' \sim P(\cdot|s, a)} \left[ \max_{a' \in \mathcal{A}} f(s', a') \right]. \quad (30)$$

*Proof.* Under the softmax parameterization, the natural policy gradient update [Kakade and Langford, 2002] can be expressed as

$$\pi_{\theta_{t+1}}(a|s) = \pi_{\theta_t}(a|s) \frac{\exp(\eta Q^{\pi_{\theta_t}}(s, a)/(1-\gamma))}{Z_t(s, a)}, \quad (31)$$

where the normalization constant  $Z_t(s)$  is defined as:

$$Z_t(s) = \sum_{a \in \mathcal{A}} \pi_{\theta_t}(a|s) \exp\left(\frac{\eta Q^{\pi_{\theta_t}}(s, a)}{1-\gamma}\right). \quad (32)$$

Since with the reverse KL term we no longer have the close form softmax update under natural policy gradient algorithm. For simplicity we drop the KL term in the theoretical proof here as under assumption A.1 after the pretrain stage the KL term no longer dominate the loss function, and we mainly focus on the proof on the balance between reward and cost.

We admit that omitting the reverse KL divergence term simplifies the derivation of a closed-form NPG update, yet the core insights from this analysis are expected to remain relevant to the behavior of the full DRCORL algorithm. This is mainly because:

- 937 (i) The initial pretraining of the diffusion model (Section 3.1) and its subsequent use as a regularizer  
 938 (Section 3.2) aim to ensure the learned policy  $\pi_\theta$  primarily operates within a region close to the  
 939 behavioral policy  $\pi_b$ . Assumption A.1 formalizes this by bounding the KL divergence.
- 940 (ii) In this regularized regime, the KL term primarily acts to constrain exploration and prevent  
 941 significant deviation from the data distribution. The fundamental trade-offs and convergence dynamics  
 942 related to balancing expected rewards and costs are still governed by the NPG updates on these value  
 943 estimations. Thus, the analysis, while idealized, sheds light on the core learning dynamics concerning  
 944 reward maximization under cost constraints.

945 **Assumption A.2.** Given an offline dataset  $\mathcal{D}^\mu = \{(s_i, a_i, s'_i, r_i, c_i)\}_{i=1}^N$  of size  $|\mathcal{D}^\mu| = N$ , let the  
 946 value function class be  $\mathcal{F}$  and define the model class as  $\mathcal{G} = \{\mathcal{T}f | f \in \mathcal{F}\}$ . We assume:

- 947 • **Realizability:** The critic function  $Q^*$ , learned by optimizing Eq. (16), Eq. (17), and Eq. (18),  
 948 belongs to the function class  $\mathcal{F}$ , and  $\mathcal{T}Q^*$  resides in the model class  $\mathcal{G}$ . Moreover, we assume  
 949  $\mathcal{G} = \mathcal{F}$ .
- 950 • **Dataset Diversity:** The offline dataset is diverse enough to ensure accurate offline policy evaluation.  
 951 Specifically, we assume that:

$$N = \mathcal{O} \left( \frac{C \ln(|\mathcal{F}|/\delta)}{\epsilon_{\text{offline}}(1-\gamma)^4} \right), \quad (33)$$

952 where  $\epsilon_{\text{offline}}$  is the desired accuracy, and  $\delta$  is the failure probability.

953 By invoking Chen and Jiang [2019, Theorem 3], we can show that under Assumption A.2, with  
 954 probability at least  $1 - \delta$ , the following bounds hold:

$$\|\hat{Q}_r^\pi - Q_r^{\pi,*}\| \leq \epsilon_{\text{offline}}, \quad \|\hat{Q}_c^\pi - Q_c^{\pi,*}\| \leq \epsilon_{\text{offline}}. \quad (34)$$

955 Then, by Gu et al. [2024b, Lemma A.2], we can show that the policy update with gradient manipula-  
 956 tion satisfies that:

- 957 • For all  $t \in S_{\text{safe}}$ , the bound on the reward function is given by:

$$\begin{aligned} V_r^{\pi_{\theta^*}}(\rho) - V_r^{\pi_{\theta_t}}(\rho) &\leq \frac{1}{\eta} \mathbb{E}_{s \sim d_{\rho}^{\pi_{\theta^*}}} [D_{\text{KL}}(\pi_{\theta^*}(\cdot|s) \| \pi_{\theta_t}(\cdot|s)) - D_{\text{KL}}(\pi_{\theta^*}(\cdot|s) \| \pi_{\theta_{t+1}}(\cdot|s))] \\ &\quad + \frac{2\eta|\mathcal{S}||\mathcal{A}|M^2}{(1-\gamma)^3} + \frac{3(1+\eta M)}{(1-\gamma)^2} \|Q_r^{\pi_{\theta_t}} - \hat{Q}_r^{\pi_{\theta_t}}\|_2. \end{aligned} \quad (35)$$

- 958 • Similarly, for all  $t \in S_{\text{unsafe}}$ , the bound on the cost function is:

$$\begin{aligned} V_c^{\pi_{\theta^*}}(\rho) - V_c^{\pi_{\theta_t}}(\rho) &\leq \frac{1}{\eta} \mathbb{E}_{s \sim d_{\rho}^{\pi_{\theta^*}}} [D_{\text{KL}}(\pi_{\theta^*}(\cdot|s) \| \pi_{\theta_t}(\cdot|s)) - D_{\text{KL}}(\pi_{\theta^*}(\cdot|s) \| \pi_{\theta_{t+1}}(\cdot|s))] \\ &\quad + \frac{2\eta|\mathcal{S}||\mathcal{A}|M^2}{(1-\gamma)^3} + \frac{3(1+\eta M)}{(1-\gamma)^2} \|Q_c^{\pi_{\theta_t}} - \hat{Q}_c^{\pi_{\theta_t}}\|_2. \end{aligned} \quad (36)$$

- 959 • For  $t \in S_{\text{align}}$ , we have the combined bound for reward and cost as:

$$\begin{aligned} &\frac{1}{2} (V_r^{\pi_{\theta^*}}(\rho) - V_r^{\pi_{\theta_t}}(\rho)) + \frac{1}{2} (V_c^{\pi_{\theta^*}}(\rho) - V_c^{\pi_{\theta_t}}(\rho)) \\ &\leq \frac{1}{\eta} \mathbb{E}_{s \sim d_{\rho}^{\pi_{\theta^*}}} (D_{\text{KL}}(\pi_{\theta^*}(\cdot|s) \| \pi_{\theta_t}(\cdot|s)) - D_{\text{KL}}(\pi_{\theta^*}(\cdot|s) \| \pi_{\theta_{t+1}}(\cdot|s))) + \frac{2\eta M^2 |\mathcal{S}||\mathcal{A}|}{(1-\gamma)^3} \\ &\quad + \frac{3(1+\eta M)}{(1-\gamma)^2} \left[ \frac{1}{2} \|Q_r^{\pi_{\theta_t}}(s, a) - \hat{Q}_r^{\pi_{\theta_t}}(s, a)\|_2 + \frac{1}{2} \|Q_c^{\pi_{\theta_t}}(s, a) - \hat{Q}_c^{\pi_{\theta_t}}(s, a)\|_2 \right]. \end{aligned} \quad (37)$$

960 • Finally for  $t \in S_{\text{conflict}}$ , it holds that

$$\begin{aligned}
& \left( \frac{1}{2} - \frac{\langle g_r^t, g_c^t \rangle}{2\|g_r^t\|^2} \right) (V_r^{\pi_{\theta^*}}(\rho) - V_r^{\pi_{\theta_t}}(\rho)) + \left( \frac{1}{2} - \frac{\langle g_c^t, g_r^t \rangle}{2\|g_c^t\|^2} \right) (V_c^{\pi_{\theta^*}}(\rho) - V_c^{\pi_{\theta_t}}(\rho)) \\
& \leq \frac{1}{\eta} \mathbb{E}_{s \sim d_{\rho}^{\pi_{\theta^*}}} (D_{\text{KL}}(\pi_{\theta^*}(\cdot|s) \|\pi_{\theta_t}(\cdot|s)) - D_{\text{KL}}(\pi_{\theta^*}(\cdot|s) \|\pi_{\theta_{t+1}}(\cdot|s))) \\
& \quad + \frac{2\eta M^2 \left( 1 - \frac{\langle g_r^t, g_c^t \rangle}{2\|g_r^t\|^2} - \frac{\langle g_r^t, g_c^t \rangle}{2\|g_c^t\|^2} \right) |\mathcal{S}||\mathcal{A}|}{(1-\gamma)^3} \\
& \quad + \frac{3(1+\eta M)}{(1-\gamma)^2} \left[ \frac{1}{2} \|Q_r^{\pi_{\theta_t}}(s, a) - \hat{Q}_r^{\pi_{\theta_t}}(s, a)\|_2 + \frac{1}{2} \|Q_c^{\pi_{\theta_t}}(s, a) - \hat{Q}_c^{\pi_{\theta_t}}(s, a)\|_2 \right].
\end{aligned} \tag{38}$$

961 Summing the four equations, Eq. (35), Eq. (36), Eq. (37), and Eq. (38), we obtain that

$$\begin{aligned}
& \sum_{t \in S_{\text{unsafe}}} (V_c^{\pi_{\theta^*}}(\rho) - V_c^{\pi_{\theta_t}}(\rho)) + \frac{1}{2} \sum_{t \in S_{\text{align}}} (V_c^{\pi_{\theta^*}}(\rho) - V_c^{\pi_{\theta_t}}(\rho)) \\
& \quad + \left( \frac{1}{2} - \frac{\langle g_r^t, g_c^t \rangle}{2\|g_c^t\|^2} \right) \cdot (V_c^{\pi_{\theta^*}}(\rho) - V_c^{\pi_{\theta_t}}(\rho)) \\
& \leq \frac{1}{\eta} \mathbb{E}_{s \sim d_{\rho}^{\pi_{\theta^*}}} D_{\text{KL}}(\pi_{\theta^*}(\cdot|s) \|\pi_{\theta_0}(\cdot|s)) + \frac{2\eta|\mathcal{S}||\mathcal{A}|M^2T}{(1-\gamma)^3} + e_Q,
\end{aligned} \tag{39}$$

962 where  $e_Q$  is the accumulated weighted critic error, defined as:

$$\begin{aligned}
e_Q &= \sum_{t \in S_{\text{safe}}} \frac{3(1+\eta M)}{(1-\gamma)^2} \|Q_r^{\pi_{\theta_t}} - \hat{Q}_r^{\pi_{\theta_t}}\|_2 + \sum_{t \in S_{\text{unsafe}}} \frac{3(1+\eta M)}{(1-\gamma)^2} \|Q_c^{\pi_{\theta_t}} - \hat{Q}_c^{\pi_{\theta_t}}\|_2 \\
& \quad + \sum_{t \in S_{\text{align}}} \frac{3(1+\eta M)}{(1-\gamma)^2} \left[ \frac{1}{2} \|Q_r^{\pi_{\theta_t}}(s, a) - \hat{Q}_r^{\pi_{\theta_t}}(s, a)\|_2 + \frac{1}{2} \|Q_c^{\pi_{\theta_t}}(s, a) - \hat{Q}_c^{\pi_{\theta_t}}(s, a)\|_2 \right] \\
& \quad + \sum_{t \in S_{\text{conflict}}} \frac{3(1+\eta M)}{(1-\gamma)^2} \left[ \left( \frac{1}{2} - \frac{\langle g_r^t, g_c^t \rangle}{2\|g_r^t\|^2} \right) \|Q_r^{\pi_{\theta_t}}(s, a) - \hat{Q}_r^{\pi_{\theta_t}}(s, a)\|_2 \right. \\
& \quad \left. + \left( \frac{1}{2} - \frac{\langle g_r^t, g_c^t \rangle}{2\|g_c^t\|^2} \right) \|Q_c^{\pi_{\theta_t}}(s, a) - \hat{Q}_c^{\pi_{\theta_t}}(s, a)\|_2 \right].
\end{aligned} \tag{40}$$

Now, we need to upper bound the weighted critic error  $e_Q$ . We assume that there exists a positive constant  $C$  such that  $e_Q$  with  $\frac{3CT(1+\eta M)}{(1-\gamma)^2} \epsilon_{\text{offline}}$ . According to Gu et al. [2024b, Lemma A.6], by choosing reasonably large values for  $h^+$  and  $h^-$ , we can ensure that:

$$|S_{\text{unsafe}}| + |S_{\text{align}}| + |S_{\text{conflict}}| \geq T/2.$$

963 For example, by setting  $h^+ = 2\sqrt{\frac{|\mathcal{S}||\mathcal{A}|}{(1-\gamma)^3 T}} (\epsilon_{\text{dist}} + 4M^2 + 6M)$  and  $h^- = 0$ , this condition holds.

964 Now, we define the weighted policy  $\tilde{\pi}$  as follows

$$\tilde{\pi}(a|s) = \frac{\sum_{t=1}^T w_t \pi_t(a|s)}{\sum_{t=1}^T w_t}, \tag{41}$$

965 where the policy weights are assigned based on the categories of iterations: 1. Weight  $w_t = 1$  for  
966  $t \in S_{\text{safe}}$ , 2. Weight  $w_t = 0$  for  $t \in S_{\text{unsafe}}$ ,

967 3. Weight  $w_t = \frac{1}{2} - \frac{\langle g_r^t, g_c^t \rangle}{\|g_r^t\|^2}$  for  $t \in S_{\text{conflict}}$ . Under the weighted policy  $\tilde{\pi}$ , the following bound holds  
968 true for the reward value function:

$$\begin{aligned}
V_r^{\pi^*} - V_r^{\tilde{\pi}} &\leq \frac{1}{\frac{1}{2}T} \left( \frac{1}{\eta} \mathbb{E}_{s \sim d_{\rho}^{\pi_{\theta^*}}} D_{\text{KL}}(\pi_{\theta^*}(\cdot|s) \|\pi_{\theta_t}(\cdot|s)) + \frac{2\eta|\mathcal{S}||\mathcal{A}|M^2T}{(1-\gamma)^3} + e_Q \right) \\
&\leq \frac{4}{T} \left( \frac{1}{\eta} \epsilon_{\text{dist}} + \frac{2\eta|\mathcal{S}||\mathcal{A}|M^2T}{(1-\gamma)^3} + \frac{3CT(1+\eta M)}{(1-\gamma)^2} \epsilon_{\text{offline}} \right).
\end{aligned} \tag{42}$$



Now, by choosing  $\eta = \sqrt{\epsilon_{\text{dist}}(1-\gamma)^3/(2\eta|\mathcal{S}||\mathcal{A}|M^2 + 3CT\eta M(1-\gamma)\epsilon_{\text{offline}})}$ , we can ensure that

$$\begin{aligned} V_r^{\pi^*} - V_r^{\tilde{\pi}} &\leq \frac{1}{\sqrt{T}} \sqrt{\frac{32(2\eta|\mathcal{S}||\mathcal{A}|M^2 + 3(1+\eta M)(1-\gamma)\epsilon_{\text{offline}})}{(1-\gamma)^3}} + \frac{3C\epsilon_{\text{offline}}}{(1-\gamma)^2} \\ &= \mathcal{O}\left(\sqrt{\frac{|\mathcal{S}||\mathcal{A}|}{(1-\gamma)^3 T}}\right) + \mathcal{O}(\epsilon_{\text{offline}}). \end{aligned} \quad (43)$$

Finally, the safety bound is given as:

$$\begin{aligned} &V_c^{\tilde{\pi}}(\rho) - b \\ &\leq \frac{4}{T} \left[ \sum_{t \in S_{\text{safe}}} (V_c^{\pi_{\theta_t}}(\rho) - b) + \frac{1}{2} \sum_{t \in S_{\text{align}}} (V_c^{\pi_{\theta_t}}(\rho) - b) + \left(\frac{1}{2} - \frac{\langle g_c^t, g_r^t \rangle}{2\|g_c^t\|^2}\right) \sum_{t \in S_{\text{conflict}}} (V_c^{\pi_{\theta_t}}(\rho) - b) \right] \\ &\leq \frac{4}{T} \left[ \sum_{t \in S_{\text{safe}}} \underbrace{(\hat{V}_c^{\pi_{\theta_t}}(\rho) - b)}_{\leq -h^-} + \frac{1}{2} \sum_{t \in S_{\text{align}}} \underbrace{(\hat{V}_c^{\pi_{\theta_t}}(\rho) - b)}_{\leq h^+} + \left(\frac{1}{2} - \frac{\langle g_c^t, g_r^t \rangle}{2\|g_c^t\|^2}\right) \sum_{t \in S_{\text{conflict}}} \underbrace{(\hat{V}_c^{\pi_{\theta_t}}(\rho) - b)}_{\leq h^+} \right] \\ &+ \frac{4}{T} \left[ \sum_{t \in S_{\text{safe}}} (V_c^{\pi_{\theta_t}}(\rho) - \hat{V}_c^{\pi_{\theta_t}}(\rho)) + \sum_{t \in S_{\text{align}}} (V_c^{\pi_{\theta_t}}(\rho) - \hat{V}_c^{\pi_{\theta_t}}(\rho)) + \sum_{t \in S_{\text{conflict}}} (V_c^{\pi_{\theta_t}}(\rho) - \hat{V}_c^{\pi_{\theta_t}}(\rho)) \right] \\ &\leq 2h^+ + 2\epsilon_{\text{offline}} = \mathcal{O}(\epsilon_{\text{offline}}) + \mathcal{O}\left(\sqrt{\frac{|\mathcal{S}||\mathcal{A}|}{(1-\gamma)^3 T}}\right). \end{aligned} \quad (44)$$

This completes the proof of Theorem 3.1. ■

## B Supplemental Materials for Algorithm 1

### B.1 Clarification for the Main Body

**Inconsistency in critic update.** In the training process, we specifically adopt a conservative estimation for the cost critic, the differing update strategies for  $Q_r^{\pi}$  and  $Q_c^{\pi}$  are intentional and reflect their distinct roles in our framework. The cost critic  $Q_c^{\pi}$  plays a critical role in enforcing safety, so we adopt a pessimistic update to penalize uncertain or unsafe state-action pairs—particularly in low-coverage areas—consistent with prior work on conservative critics in offline RL.

In contrast, the reward critic  $Q_r^{\pi}$  guides policy optimization within the safe region. Applying pessimism here may lead to overly conservative behavior, reducing performance. We therefore use a standard update to maintain a balance between safety and reward. Our gradient manipulation mechanism relies on  $Q_c^{\pi}$  to modulate the influence of each objective, making a pessimistic cost critic essential for reliable safety adaptation. We appreciate the concern about value overestimation and will explore robust reward estimation techniques in future work.

**Pretraining stage.** We pretrain the diffusion model to accurately capture the behavioral policy from the offline dataset, enabling it to serve as a stable regularizer for the Gaussian policy during training. Unlike diffusion-based planning methods, our approach uses the diffusion model’s score function to penalize out-of-distribution actions, improving stability.

After pretraining, the diffusion model remains fixed. However, updating the critics during training is crucial, as they guide the gradient manipulation mechanism to balance reward maximization and safety. This separation ensures effective and stable policy optimization throughout training.

**Gradient Manipulation Stage.** the gradient manipulation method employed in our approach differs fundamentally from the naive weighted average of the two objectives. Specifically, we dynamically adjust gradient weights based on the extent of safety constraint violations, guided by slack variables. When the safety threshold is significantly violated, parameter updates are driven primarily by the gradient of the safety objective. Conversely, when the current policy strictly adheres

997 to safety constraints, updates are performed using only the gradient of the performance objective. In  
 998 intermediate scenarios, we judiciously combine both gradients.

999 To address the potential instability, our approach carefully assigns weights according to the angle  
 1000 between gradients, as detailed in Equation (12) of the main body. Instability typically arises when the  
 1001 angle between gradients exceeds  $90^\circ$ . Our weighting strategy effectively mitigates gradient conflicts,  
 1002 preventing gradient degradation and enhancing the stability and reliability of the optimization process.  
 1003 Additionally, our method does not require the reward and cost critics to share parameters. Instead, we  
 1004 temporarily freeze and save the policy parameters to implement gradient manipulation. For example,  
 1005 given two separate critics,  $Q_r^\pi$  and  $Q_c^\pi$ , we first store the initial parameters of the policy  $\pi_0$ . We  
 1006 then independently compute updates using each critic. By comparing the updated policy parameters  
 1007 with the initial parameters, we obtain the gradient values required for manipulation. Through this  
 1008 scenario-based approach to parameter updates, we effectively ensure training stability.

## 1009 B.2 Safety Adaptation Step

1010 We outline the Safe Adaptation step in Algorithm 1, specifically detailed in Algorithm 2. Our main  
 1011 theorem (Theorem 3.1) is derived based on the safety adaptation procedure described in Algorithm 2.  
 1012 Our diffusion regularization method is compatible with both CRPO Xu et al. [2021] and the gradient  
 1013 manipulation method Gu et al. [2024a], as implemented in Algorithm 2. Both algorithms aim to  
 1014 switch dynamically between reward optimization and cost optimization.

1015 The key distinction lies in their approach to handling scenarios where the cost is close to the cost  
 1016 limit threshold. In Algorithm 2 incorporates gradient manipulation in these scenarios,  
 1017 further stabilizing the training process by addressing conflicts between the objectives. Theorem  
 1018 3.1 specifically considers the diffusion regularization algorithm equipped with the safe adaptation  
 1019 procedure outlined in Algorithm 2. The fundamental difference between the two algorithms lies in  
 1020 the criteria for switching between reward and cost optimization objectives.

---

### Algorithm 2 Gradient Manipulation Adaptation

---

**Require:** Dataset  $\mathcal{D}^\mu$

**Require:** Slack variable  $h^+$ ,  $h^-$  and cost limit  $l$

**Procedure:** SafeAdaptation( $\pi_\theta, \epsilon_\psi, Q_r^{\pi_\theta}, Q_c^{\pi_\theta}, h^+, h^-$ )

**if**  $Q_c^{\pi, \text{UCB}}(\rho) \leq l - h^-$  **then**

    Optimize reward by solving Eq. (19)

**else if**  $Q_c^{\pi, \text{UCB}}(\rho) \leq l + h^+$  **then**

    Compute  $g_r$  and  $g_c$  with Eq. (21)

    Gradient manipulation to obtain  $g$  with Eq. (12)

**else**

    Ensure safety by solving Eq. (20)

**end if**

**end procedure**

---

## 1021 B.3 Hybrid Extension

1022 **Hybrid Agents.** The assumption of the offline reinforcement learning setting can be extended by  
 1023 allowing the agent to incorporate partial online interactions during the training episode. This extension  
 1024 enables further updates to the critic function, enhancing its ability to evaluate safety conditions with  
 1025 greater accuracy. Since the problem remains within the scope of offline reinforcement learning, we  
 1026 restrict hybrid access to two specific types:

- 1027 • Access to a simulator for evaluating the cost values  $V_c^\pi$ .
- 1028 • Access to a limited number of trajectories collected by the current policy, which can be used to  
 1029 update the critics and policies, thereby partially mitigating the impact of distributional shift.

1030 With the hybrid assumption, We propose two distinct approaches for evaluating costs: **Offline**  
 1031 **Evaluation** and **Online Evaluation**. For the whole offline setting, we only use the critic functions  
 1032 learned from the offline dataset to evaluate the cost constraints, while for the hybrid agent we allow  
 1033 for online trajectory access.

## 1034 Offline Evaluation

1035 For the hybrid agents discussed in section A, we consider two distinct forms of hybrid access to  
1036 environment data.

1037 In the fully offline setting, we estimate the cost value  $V_c^\pi(\rho)$  by randomly sampling a batch of states  
1038  $\mathcal{B}_s$  from the static dataset. We assume that the state distribution in the dataset  $s \sim \mathcal{D}^\mu$  is sufficiently  
1039 close to the target distribution  $\rho$ . The cost estimator is defined as:

$$\hat{V}_c^\pi(\rho) = \frac{1}{|\mathcal{B}_s|} \sum_{s \in \mathcal{B}_s} V_c^\pi(s).$$

1040 To avoid hyperparameter tuning and additional budget constraints on the value function, we transform  
1041 the value function into an estimated episodic cost. Since the value function  $V_c^\pi$  can be expressed as:

$$V_c^\pi(\rho) = \frac{1}{1-\gamma} \mathbb{E}_{s \sim d_\rho^\pi, a \sim \pi(\cdot|s)} [r(s, a)],$$

1042 we define the estimated episodic cost as  $\hat{V}_c^\pi(1-\gamma)L$ , where  $L$  represents the episodic length.

## 1043 Online Evaluation

- 1044 • Agents are allowed to collect a limited number of trajectories to evaluate the safety of the current  
1045 policy. Based on this evaluation, the agent determines whether to prioritize optimizing the reward,  
1046 jointly optimizing reward and cost, or exclusively optimizing the cost. This process serves as a  
1047 performance assessment of the learned policy during each episode.
- 1048 • Agents can roll out a predefined number of trajectories to update the critic function in each  
1049 episode. To ensure the setting remains consistent with offline reinforcement learning, the number  
1050 of trajectories is strictly limited; otherwise, it would replicate a fully online reinforcement learning  
1051 setting. By leveraging this partial online data, the agent mitigates overestimation errors in the critic  
1052 function, thereby improving its ability to evaluate and optimize the policy effectively.

## 1053 B.4 Further Discussion on Safe Reinforcement Learning

1054 In this section, we discuss on the difference between the hard constraint and soft constraint in safe  
1055 reinforcement learning.

1056 **Hard Constraints.** Existing works focusing on hard constraints allow no violation on safety  
1057 conditions, i.e.

$$c(s_t, a_t) = 0, \forall t \geq 0. \quad (45)$$

1058 **Soft Constraints.** A variety of works focus on the soft constraint setting, the safe constraint restricts  
1059 the cost limit below a certain limit  $l$ , either within an episode or being step wise. Which can either  
1060 can be episodic limit as

$$\mathbb{E} \left[ \sum_{t=0}^T c(s_t, a_t) \right] \leq l \quad \text{or} \quad \mathbb{E} \left[ \sum_{t=0}^T \gamma^t c(s_t, a_t) \right] \leq l, \quad (46)$$

1061 or be the stepwise limit as

$$\mathbb{E}[c(s_t, a_t)] \leq l, a_t \sim \pi(\cdot|s_t). \quad (47)$$

1062 Still this type of problem allow for certain degree of safety violations as in Xu et al. [2022], Lin et al.  
1063 [2023], but the soft constraints also allow for broader potential policy class to further explore higher  
1064 reward. We choose the soft constraint as it allows for exploration to search for higher rewards.

## 1065 B.5 Discussion on Settings

1066 **Comparison with Offline Reinforcement Learning.** In the context of safe reinforcement learning,  
1067 simply pretraining the critic before extracting the policy is insufficient for learning an optimal policy.  
1068 This contrasts with approaches such as those in Chen et al. [2024, 2023], where pretraining a reward  
1069 critic  $Q_\phi(s, a)$  under the behavioral policy  $\pi_b$  using IQL Kostrikov et al. [2021] is sufficient. These  
1070 methods do not require further updates to the critic during policy extraction.

1071 In safe reinforcement learning, however, optimization involves the reverse KL divergence term:

$$\mathbb{E}_{s,a \sim \mathcal{D}^\mu} \left[ Q_\phi(s, a) - \frac{1}{\beta} D_{\text{KL}}(\pi(\cdot|s) \parallel \mu(\cdot|s)) \right], \quad (48)$$

1072 where  $\mu(\cdot|s)$  represents the behavioral policy used to collect the offline dataset. The optimal policy  
1073  $\pi_\theta^*$  for Eq. (48) is given by:

$$\pi_{\theta^*}(a|s) \propto \mu(a|s) \exp(\beta Q_\phi(s, a)). \quad (49)$$

1074 Essentially, offline reinforcement learning algorithms aim to extract a policy  $\pi_\theta$  that adheres to  
1075 the energy-based form presented in Eq. (49). However, in the safe reinforcement learning setting,  
1076 the optimal reward critic, when unconstrained, cannot be directly used for optimizing the reward  
1077 objective. Therefore, it must be updated during the safety adaptation stage.

1078 **Comparison with Constrained Reinforcement Learning.** While most safe reinforcement learning  
1079 literature focuses on the online setting, the offline setting presents unique challenges for policy  
1080 extraction. In the offline scenario, the agent’s only access to the environment is through an offline  
1081 dataset  $\mathcal{D}^\mu$ , which consists of transition tuples. Ideally, these transition tuples can be utilized to  
1082 construct estimators for the transition dynamics  $\hat{P}(s'|s, a)$ , the reward function  $\hat{r}(s, a)$ , and the cost  
1083 function  $\hat{c}(s, a)$ .

1084 However, Markov decision processes (MDPs) are highly sensitive to even small changes in the  
1085 reward function, requiring efficient exploitation of the offline dataset through conservative inference  
1086 and penalization of out-of-distribution (OOD) actions. To address these challenges, our approach  
1087 constrains the policy to remain within a defined neighborhood of the behavioral policy  $\pi_b$  and  
1088 adopts a pessimistic estimation of the cost critic function, effectively mitigating the risk of unsafe  
1089 implementations.

## 1090 C Details of Experiments

### 1091 C.1 Further Ablation Study

1092 **Temperature Parameter  $\beta$ .** We explore two different types of  $\beta$  schedules to regulate the trade-off  
1093 between policy exploration and adherence to the behavioral policy.

1094 • **Constant  $\beta$  Values.** In this approach,  $\beta$  is maintained as a constant throughout all epochs. A low  $\beta$   
1095 value enforces conservative Q-learning by constraining the learned policy to remain close to the  
1096 behavioral policy  $\pi_b$ . This setting prioritizes stability and minimizes divergence from the offline  
1097 dataset.

1098 • **Variation  $\beta$  Values.** Here, we employ a monotonic sequence of increasing  $\beta$  values over different  
1099 epochs. Following the pretraining phase, the weight on optimizing the reward critic is progressively  
1100 increased, or the weight on minimizing the cost critic is reduced. This dynamic adjustment  
1101 encourages the policy to explore diverse strategies, allowing it to optimize returns or reduce costs  
1102 effectively while gradually relaxing the conservativeness enforced during earlier stages of training.

1103 In the initial training phase, we set  $\beta$  to a low value (starting at 0.04) to ensure the policy remains close  
1104 to the behavioral policy, facilitating a stable foundation and minimizing out-of-distribution actions.  
1105 As training progresses, we gradually increase  $\beta$ , eventually reaching 1.0, to place greater emphasis  
1106 on optimizing the critics. This linear scheduling allows for a smooth transition from imitation to  
1107 optimization, balancing exploration and exploitation effectively. Improper tuning of  $\beta$  can impact  
1108 performance:

1109 - If  $\beta$  increases too rapidly: The policy may deviate prematurely from the behavioral policy, leading  
1110 to instability and potential safety violations due to insufficient grounding in safe behaviors.

1111 - If  $\beta$  increases too slowly: The policy may remain overly conservative, limiting performance  
1112 improvements and resulting in suboptimal reward outcomes.

1113 Therefore, a carefully planned  $\beta$  schedule is crucial to balance safety and performance. Our linear  
1114 approach has demonstrated effectiveness across various tasks.

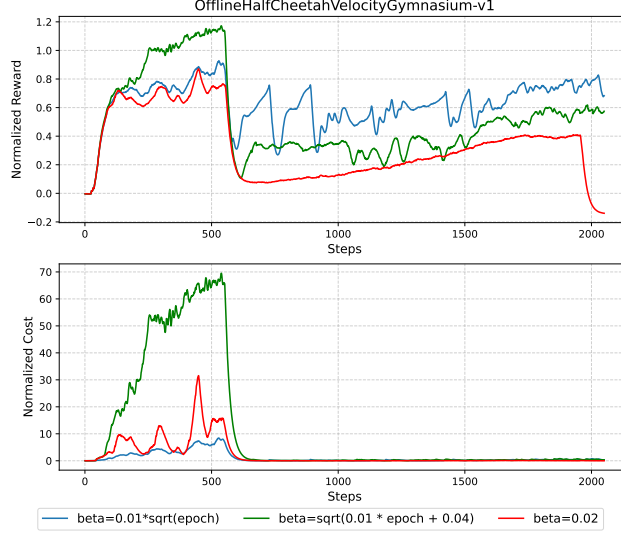

Figure 3: Training Curve Under Different Schedules. We compare the training performance of three different  $\beta$  schemes, under the square root growth we have the highest normalized reward with high stability.

**Choice of Slack Variable.** We set slack bounds relative to the normalized cost so that reward maximization applies when  $V_{\text{normalized}} \leq 1 - h^-$  and cost minimization triggers when  $V_{\text{normalized}} \geq 1 + h^+$ . During training, both  $h^-$  and  $h^+$  are linearly decayed from 0.2 to zero. An ablation study on the impact of slack values is shown in Figure 4. We tested on different initial values for  $h^+ = h^- = h \in \{0.1, 0.3, 0.5, 0.7\}$ .

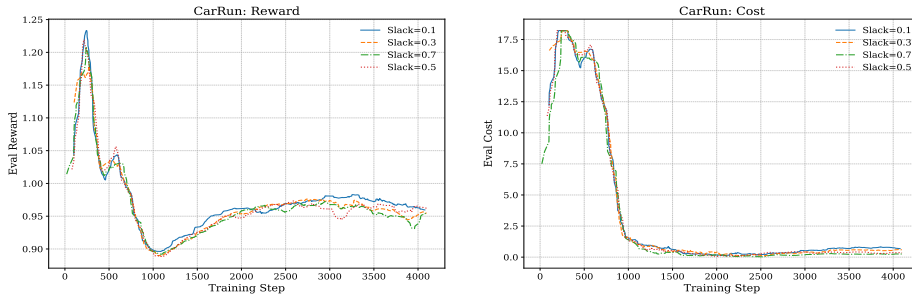

Figure 4: Slack Ablation

**Choice of cost limit.** We evaluated our algorithm on `OfflineCarRun-v0` using three cost limits ( $l \in \{10, 20, 30\}$ ) with five random seeds each. Figure 5 presents the normalized reward and cost. The normalized reward remains consistent across different limits, and the learned policy reliably keeps the cost below the safety threshold.

We present the general hyperparameter setting in Table 2. For hyperparameters that do not apply to the corresponding algorithm, we use the back slash symbol “\” to fill the blank.

**Remark C.1.** In Table 2, the update steps refer to the total number of gradient descent updates performed. The evaluation steps indicate the frequency of policy evaluation, measured in terms of gradient descent steps. The actor architecture (MLP) is specified as a list representing the hidden layers, where the input corresponds to the state  $s$  and the output is an action  $a = \pi(s)$ . Similarly, the critic architecture (MLP) is represented as a list defining the hidden layers, with the input being the state-action pair and the output being a scalar value. The parameter  $\tau$  represents the update rate between the target critic and the critic in double- $Q$  learning.

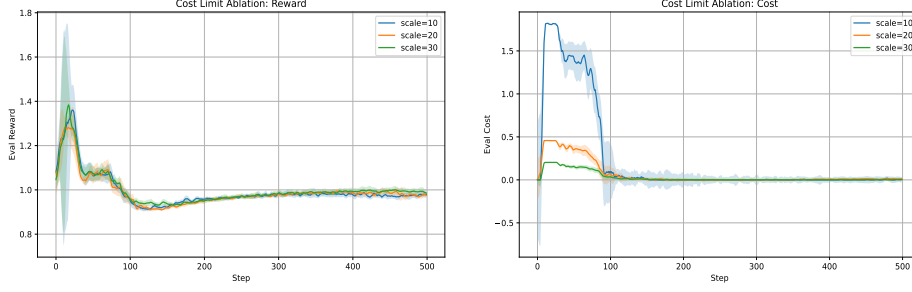

Figure 5: Cost Limit Ablation

Table 2: Summary of hyperparameter configurations for different algorithms.

| Hyperparameters          | BC-Safe   | BEARL          | BCQ-Lag        | CPQ       | COptiDICE | CDT    | CAPS      | CCAC      | Ours           |
|--------------------------|-----------|----------------|----------------|-----------|-----------|--------|-----------|-----------|----------------|
| Device                   | Cuda      | Cuda           | Cuda           | Cuda      | Cuda      | Cuda   | Cuda      | Cuda      | Cuda           |
| Batch Size               | 512       | 512            | 512            | 512       | 512       | 2048   | 512       | 512       | 256            |
| Update Steps             | 100000    | 300000         | 100000         | 100000    | 100000    | 100000 | 100000    | 100000    | 2050           |
| Eval Steps               | 2500      | 2500           | 2500           | 2500      | 2500      | 2500   | 2500      | 2500      | 1025           |
| Threads                  | 4         | 4              | 4              | 4         | 4         | 6      | 4         | 4         | 4              |
| Num workers              | 8         | 8              | 8              | 8         | 8         | 8      | 8         | 8         | 8              |
| Actor Architecture(MLP)  | [256,256] | [256,256]      | [256,256]      | [256,256] | [256,256] | \      | [256,256] | [256,256] | [256,256]      |
| Critic Architecture(MLP) | \         | [256,256]      | [256,256]      | [256,256] | [256,256] | \      | [256,256] | [256,256] | [256,256]      |
| Actor Learning rate      | .001      | .001           | .001           | .001      | .001      | .001   | .001      | .001      | .0006          |
| Critic Learning rate     | \         | .001           | .001           | .001      | .001      | \      | .001      | .001      | .0006          |
| Episode Length           | 1000      | 1000           | 1000           | 1000      | 1000      | 1000   | 1000      | 1000      | 1000           |
| $\gamma$                 | 1.00      | 0.99           | 0.99           | 0.99      | 0.99      | 0.99   | 0.99      | 0.99      | 0.99           |
| $\tau$                   | .005      | .005           | .005           | .005      | .005      | .005   | .005      | .005      | .005           |
| $h^+$                    | \         | \              | \              | \         | \         | \      | \         | \         | .2             |
| $h^-$                    | \         | \              | \              | \         | \         | \      | \         | \         | .2             |
| PID                      | \         | [.1,.003,.001] | [.1,.003,.001] | \         | \         | \      | \         | \         | [.1,.003,.001] |
| $E$                      | \         | \              | \              | \         | \         | \      | \         | \         | 4              |
| $k$                      | \         | \              | \              | \         | \         | \      | \         | \         | 2.0            |
| $\alpha$                 | \         | \              | \              | \         | \         | \      | \         | \         | .2             |

## C.2 Choice of Policy Class

- Standard Gaussian Policy Class:  $\Pi = \{a \sim \mathcal{N}(m_\theta(s), \Sigma_\theta(s))\}$ , usually the covariance  $\Sigma_\theta(s)$  matrix is a diagonal matrix.
- Gaussian Policy Class with constant variance:  $\Pi = \{a \sim \mathcal{N}(m_\theta(s), \sigma^2 I)\}$ , here the covariance matrix  $\sigma^2 I$  is state-independent.
- Dirac Policy family:  $\Pi = \{a = m_\theta(s)\}$ , we can approximate this as a Gaussian policy with variance close to 0.

## C.3 Training Details

As illustrated in Figure 6, our experiments are conducted in Safety-Gym environments and Bullet-Gymnasium environments. In this section, we present the training curves for each task. For every task, we run five independent seeds and plot, at each training step, the mean and standard deviation of both reward and cost.

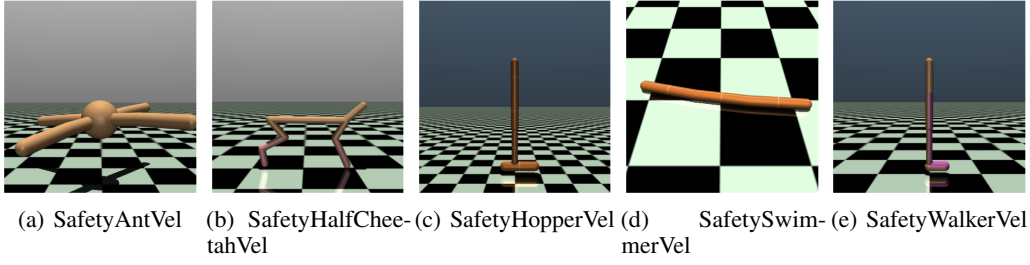

Figure 6: Safety-Gym Environments

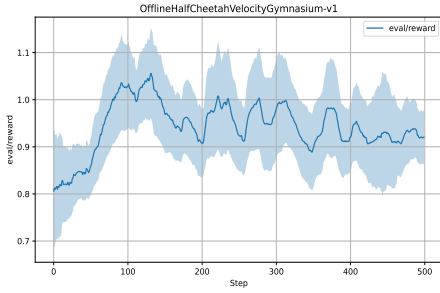

Figure 7: HalfCheetah Reward

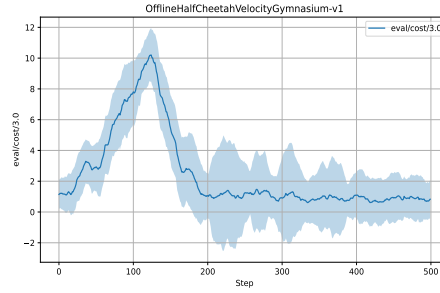

Figure 8: HalfCheetah Cost

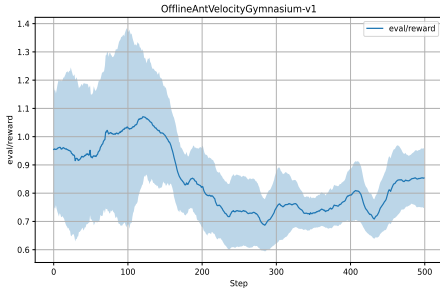

Figure 9: Ant Reward

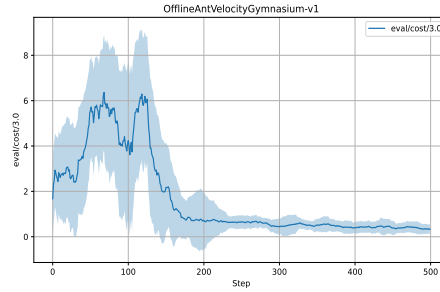

Figure 10: Ant Cost

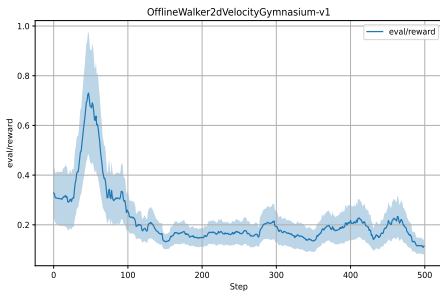

Figure 11: Walker2D Reward

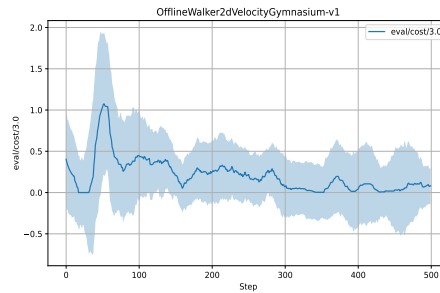

Figure 12: Walker2D Cost

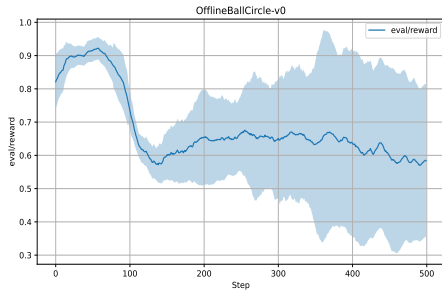

Figure 13: OfflineBallCircle Reward

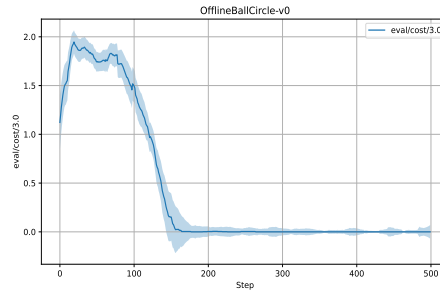

Figure 14: OfflineBallCircle Cost

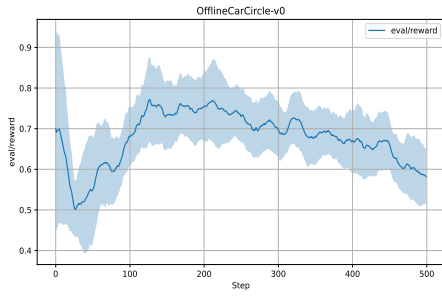

Figure 15: OfflineCarCircle Reward

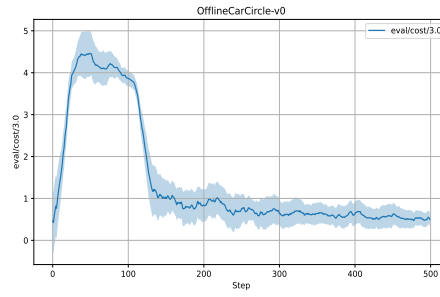

Figure 16: OfflineCarCircle Cost

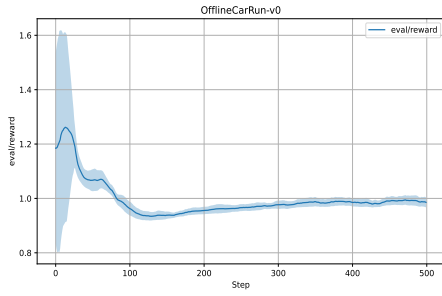

Figure 17: OfflineCarRun Reward

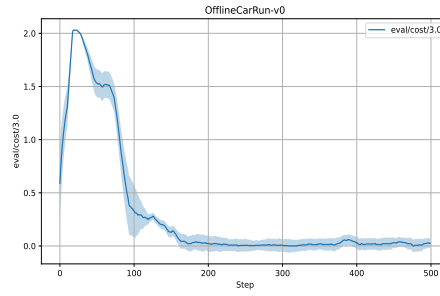

Figure 18: OfflineCarRun Cost

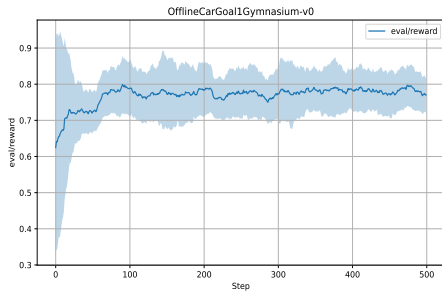

Figure 19: OfflineCarGoal1 Reward

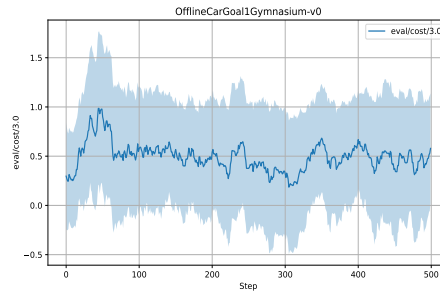

Figure 20: OfflineCarGoal1 Cost



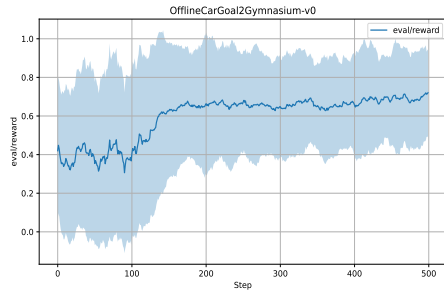

Figure 21: OfflineCarGoal2 Reward

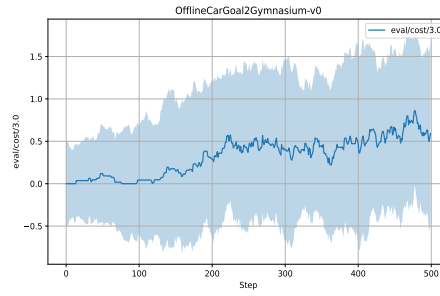

Figure 22: OfflineCarGoal2 Cost

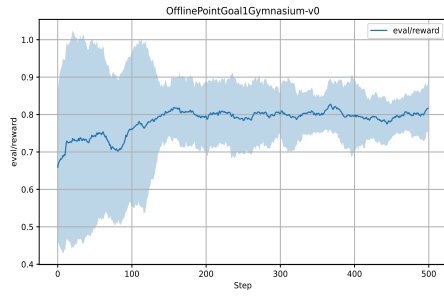

Figure 23: OfflinePointGoal1 Reward

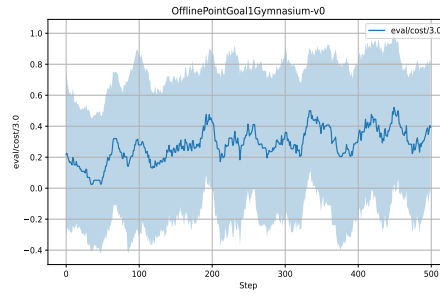

Figure 24: OfflinePointGoal1 Cost

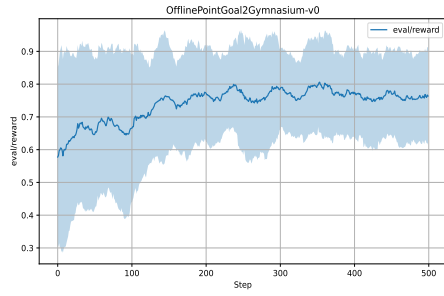

Figure 25: OfflinePointGoal2 Reward

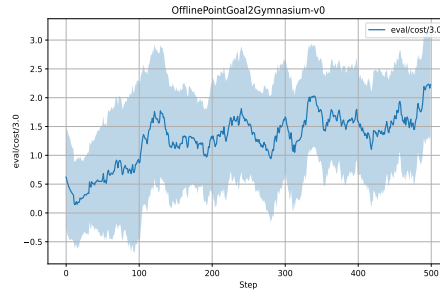

Figure 26: OfflinePointGoal2 Cost

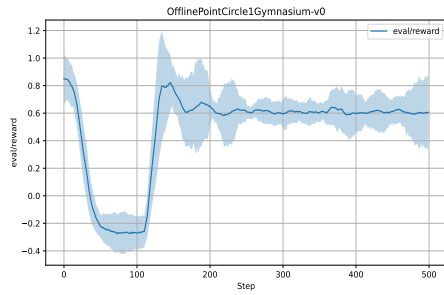

Figure 27: OfflinePointCircle1 Reward

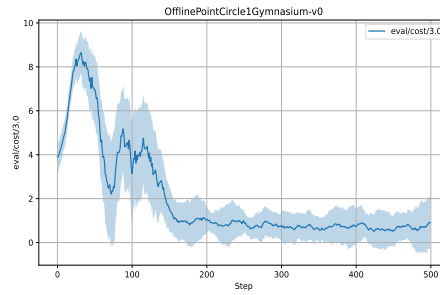

Figure 28: OfflinePointCircle1 Cost

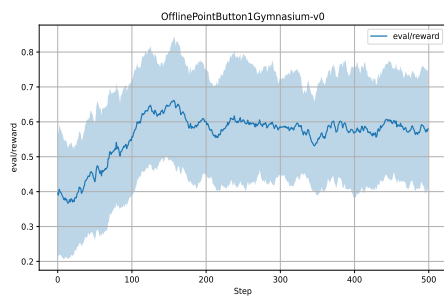

Figure 29: OfflinePointButton1 Reward

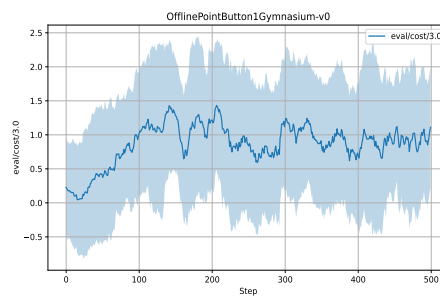

Figure 30: OfflinePointButton1 Cost
